# Supplementary material
Source: PubMed Central journal article supplement (PMC6522251)
Supplement: NIHMS1004847-supplement-Supporting_Information.pdf [file NIHMS1004847-supplement-Supporting_Information.pdf]

## Supporting Information

### **PABA/NO as an Anticancer Lead: Analogue Synthesis, Structure Revision, Solution Chemistry, Reactivity toward Glutathione, and In Vitro Activity**

Joseph E. Saavedra, Aloka Srinivasan, Gregory S. Buzard, Keith M. Davies, David J. Waterhouse, Keiko Inami, Thomas C. Wilde, Michael L. Citro, Matthew Cuellar, Jeffrey R. Deschamps, Damon Parrish, Paul J. Shami, Victoria J. Findlay, Danyelle M. Townsend, Kenneth D. Tew, Shivendra Singh, Lee Jia, Xinhua Ji, Larry K. Keefer\*

*Basic Research Program, SAIC Frederick, National Cancer Institute at Frederick, Frederick, Maryland 21702, Chemistry Section, Laboratory of Comparative Carcinogenesis, National Cancer Institute at Frederick, Frederick, Maryland 21702, Department of Chemistry, George Mason University, Fairfax, Virginia 22030, Laboratory for the Structure of Matter, Naval Research Laboratory, Washington, District of Columbia 20375, Division of Medical Oncology, Department of Internal Medicine, University of Utah, Salt Lake City, Utah 84148, Department of Cell and Molecular Pharmacology and Experimental Therapeutics, Medical University of South Carolina, Charleston, SC 29425, Department of Pharmacology, University of Pittsburgh Cancer Institute, Pittsburgh, Pennsylvania 15213, Developmental Therapeutics Program, National Cancer Institute, Bethesda, Maryland 20892, and Biomolecular Structure Section, Macromolecular Crystallography Laboratory, National Cancer Institute at Frederick, Frederick, Maryland 21702*

## CONTENTS

|                                                                                                                        | <u>Page</u> |
|------------------------------------------------------------------------------------------------------------------------|-------------|
| Figure S1. Conformational differences between distinct orientations of <b>6c</b> in the<br>crystal.....                | S4          |
| Table S1. Crystal Data and Structure Refinement for <b>6a</b> .....                                                    | S5          |
| Table S2. Atomic Coordinates and Equivalent Isotropic Displacement<br>Parameters for <b>6a</b> .....                   | S6          |
| Table S3. Bond Lengths and Angles for <b>6a</b> .....                                                                  | S7          |
| Table S4. Anisotropic Displacement Parameters for <b>6a</b> .....                                                      | S9          |
| Table S5. Hydrogen Coordinates and Isotropic Displacement Parameters for <b>6a</b> .....                               | S10         |
| Table S6. Torsion Angles for <b>6a</b> .....                                                                           | S11         |
| Table S7. Crystal Data and Structure Refinement for <b>6c</b> .....                                                    | S12         |
| Table S8. Atomic Coordinates and Equivalent Isotropic Displacement<br>Parameters for <b>6c</b> .....                   | S13         |
| Table S9. Bond Lengths and Angles for <b>6c</b> .....                                                                  | S16         |
| Table S10. Anisotropic Displacement Parameters for <b>6c</b> .....                                                     | S22         |
| Table S11. Hydrogen Coordinates and Isotropic Displacement Parameters for <b>6c</b> .....                              | S25         |
| Table S12. Torsion Angles for <b>6c</b> .....                                                                          | S27         |
| Table S13. IC <sub>50</sub> Values for Compounds <b>6a</b> – <b>6d</b> in the HL-60 and NIH 3T3 Cell Lines. .<br>..... | S33         |
| Description of Methods Used to Collect Data for Table S13 .....                                                        | S34         |

|                                                                                                                                                                            |     |
|----------------------------------------------------------------------------------------------------------------------------------------------------------------------------|-----|
| Table S14. Dependence of First-Order Rate Constants for Reaction of <b>6a</b> – <b>6d</b> with<br>Glutathione in 0.10 M Phosphate Buffer on Glutathione Concentration..... | S36 |
| Figure S2. Nitric oxide generation during reaction of GSH with <b>6a</b> .....                                                                                             | S37 |
| Figure S3. Nitric oxide generation during reaction of GSH with <b>6b</b> , <b>6c</b> and <b>6d</b> .....                                                                   | S38 |

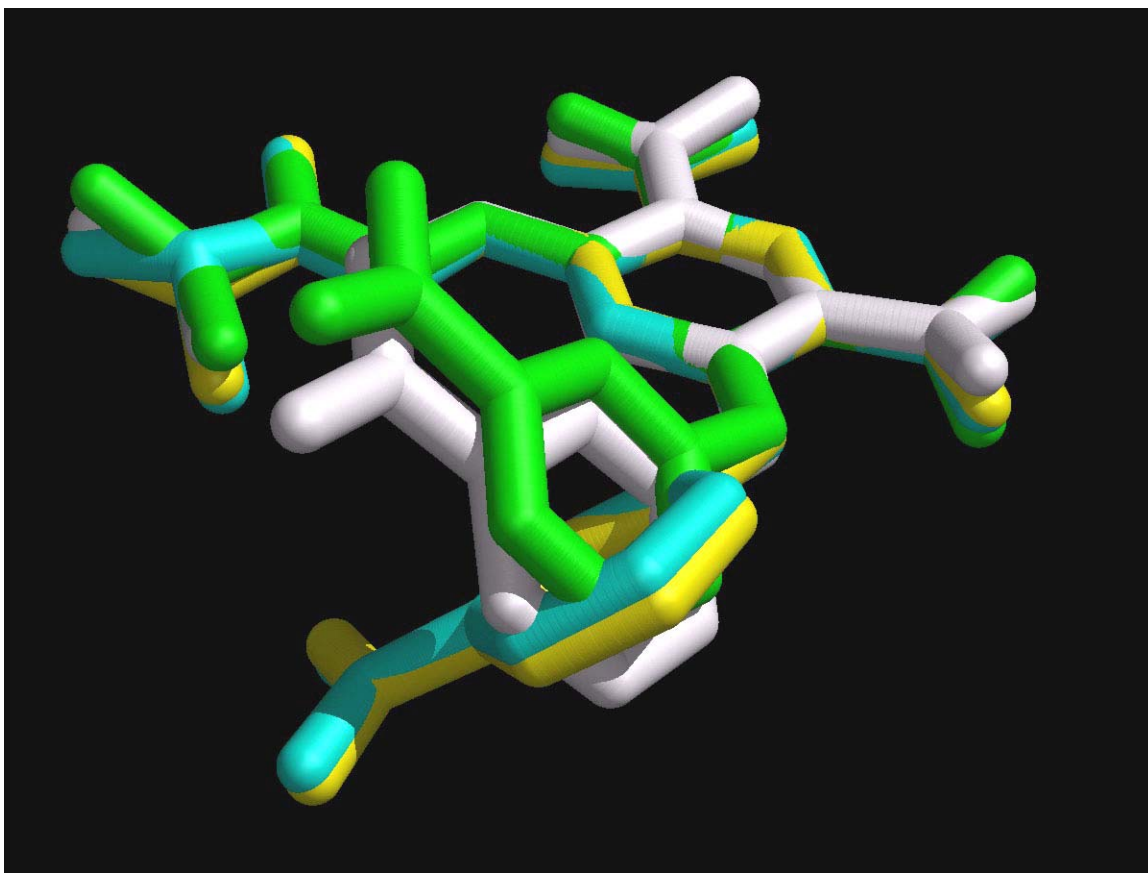

Figure S1. Conformational differences in **6c** after superimposing the carbon atoms of the dinitrobenzene ring. Note the good agreement in the structures except in the area of the benzoate ring, which shows two distinct orientations.

**Table S1.** Crystal data and structure refinement for **6a**.

|                                        |                                                            |                            |
|----------------------------------------|------------------------------------------------------------|----------------------------|
| Empirical formula                      | $C_{16}H_{16}N_6O_8$                                       |                            |
| Formula weight                         | 420.35                                                     |                            |
| Temperature                            | 103(2) °K                                                  |                            |
| Wavelength                             | 0.71073 Å                                                  |                            |
| Crystal system                         | Monoclinic                                                 |                            |
| Space group                            | $P 2_1/n$                                                  |                            |
| Unit cell dimensions                   | $a = 14.153(4)$ Å                                          | $\alpha = 90^\circ$        |
|                                        | $b = 7.881(2)$ Å                                           | $\beta = 112.336(5)^\circ$ |
|                                        | $c = 18.163(5)$ Å                                          | $\gamma = 90^\circ$        |
| Volume                                 | 1873.8(8) Å <sup>3</sup>                                   |                            |
| Z                                      | 4                                                          |                            |
| Density (calculated)                   | 1.490 Mg/m <sup>3</sup>                                    |                            |
| Absorption coefficient                 | 0.122 mm <sup>-1</sup>                                     |                            |
| F(000)                                 | 872                                                        |                            |
| Crystal size                           | 0.43 x 0.09 x 0.08 mm <sup>3</sup>                         |                            |
| Theta range for data collection        | 2.31 to 25.42°                                             |                            |
| Index ranges                           | $-17 \leq h \leq 17, -9 \leq k \leq 6, -21 \leq l \leq 21$ |                            |
| Reflections collected                  | 7933                                                       |                            |
| Independent reflections                | 3419 [R(int) = 0.0466]                                     |                            |
| Completeness to $\theta = 25.42^\circ$ | 99.0 %                                                     |                            |
| Absorption correction                  | Semi-empirical from equivalents                            |                            |
| Max. and min. transmission             | 0.990 and 0.832                                            |                            |
| Refinement method                      | Full-matrix least-squares on F <sup>2</sup>                |                            |
| Data / restraints / parameters         | 3419 / 0 / 271                                             |                            |
| Goodness-of-fit on F <sup>2</sup>      | 1.020                                                      |                            |
| Final R indices [ $I > 2\sigma(I)$ ]   | R1 = 0.0629, wR2 = 0.1379                                  |                            |
| R indices (all data)                   | R1 = 0.1240, wR2 = 0.1620                                  |                            |
| Largest diff. peak and hole            | 0.315 and -0.297 eÅ <sup>-3</sup>                          |                            |

**Table S2.** Atomic coordinates ( $\times 10^4$ ) and equivalent isotropic displacement parameters ( $\text{\AA}^2 \times 10^3$ ) for **6a**.  $U(\text{eq})$  is defined as one third of the trace of the orthogonalized  $U_{ij}$  tensor.

|        | x        | y        | z       | U(eq) |
|--------|----------|----------|---------|-------|
| N(1)   | 11656(2) | -1598(4) | 4035(2) | 34(1) |
| O(1)   | 12394(2) | -1718(4) | 3829(2) | 53(1) |
| N(2)   | 10807(2) | -825(4)  | 3668(2) | 34(1) |
| O(2)   | 10911(2) | -86(4)   | 2986(1) | 37(1) |
| N(3)   | 11756(2) | -2320(5) | 4768(2) | 40(1) |
| C(3')  | 10811(3) | -2286(6) | 4926(2) | 39(1) |
| C(3'') | 12302(3) | -3912(5) | 4904(2) | 39(1) |
| C(1)   | 10027(3) | 666(5)   | 2509(2) | 31(1) |
| C(2)   | 9938(3)  | 1232(5)  | 1756(2) | 30(1) |
| N(2')  | 10754(2) | 991(5)   | 1448(2) | 41(1) |
| O(2')  | 11609(2) | 608(5)   | 1914(2) | 79(1) |
| O(2'') | 10529(2) | 1172(5)  | 737(2)  | 57(1) |
| C(3)   | 9057(3)  | 2014(5)  | 1245(2) | 31(1) |
| C(4)   | 8242(3)  | 2244(5)  | 1476(2) | 28(1) |
| N(4)   | 7345(2)  | 3131(4)  | 925(2)  | 32(1) |
| O(4)   | 7195(2)  | 3112(4)  | 214(2)  | 43(1) |
| O(4')  | 6796(2)  | 3883(4)  | 1199(2) | 40(1) |
| C(5)   | 8304(2)  | 1621(5)  | 2217(2) | 26(1) |
| C(6)   | 9183(3)  | 852(5)   | 2719(2) | 29(1) |
| O(7)   | 7522(2)  | 1744(3)  | 2493(1) | 31(1) |
| C(8)   | 6623(2)  | 877(5)   | 2057(2) | 27(1) |
| O(8)   | 6517(2)  | 160(3)   | 1443(1) | 36(1) |
| C(9)   | 5892(3)  | 946(5)   | 2445(2) | 28(1) |
| C(10)  | 6091(3)  | 1700(5)  | 3183(2) | 36(1) |
| C(11)  | 5370(3)  | 1685(5)  | 3522(2) | 42(1) |
| C(12)  | 4420(3)  | 910(6)   | 3131(2) | 40(1) |
| N(12)  | 3684(3)  | 859(5)   | 3447(2) | 57(1) |
| C(12A) | 3806(4)  | 1576(7)  | 4208(3) | 71(2) |
| C(13)  | 4216(3)  | 139(5)   | 2388(2) | 36(1) |
| C(14)  | 4941(3)  | 153(5)   | 2056(2) | 32(1) |

**Table S3.** Bond lengths [Å] and angles [°] for **6a**.

|                       |          |                        |          |
|-----------------------|----------|------------------------|----------|
| N(1)-O(1)             | 1.239(3) | N(1)-N(2)              | 1.284(4) |
| N(1)-N(3)             | 1.405(4) | N(2)-O(2)              | 1.426(3) |
| O(2)-C(1)             | 1.358(4) | N(3)-C(3'')            | 1.444(5) |
| N(3)-C(3')            | 1.472(4) | C(3')-H(3'A)           | 0.9800   |
| C(3')-H(3'B)          | 0.9800   | C(3')-H(3'C)           | 0.9800   |
| C(3'')-H(3'A)         | 0.9800   | C(3'')-H(3''B)         | 0.9800   |
| C(3'')-H(3''C)        | 0.9800   | C(1)-C(6)              | 1.392(4) |
| C(1)-C(2)             | 1.399(5) | C(2)-C(3)              | 1.385(5) |
| C(2)-N(2')            | 1.473(4) | N(2')-O(2'')           | 1.216(4) |
| N(2')-O(2')           | 1.223(4) | C(3)-C(4)              | 1.382(4) |
| C(3)-H(3A)            | 0.9500   | C(4)-C(5)              | 1.404(5) |
| C(4)-N(4)             | 1.461(5) | N(4)-O(4')             | 1.224(3) |
| N(4)-O(4)             | 1.227(4) | C(5)-C(6)              | 1.372(5) |
| C(5)-O(7)             | 1.381(4) | C(6)-H(6A)             | 0.9500   |
| O(7)-C(8)             | 1.395(4) | C(8)-O(8)              | 1.207(4) |
| C(8)-C(9)             | 1.458(4) | C(9)-C(10)             | 1.392(5) |
| C(9)-C(14)            | 1.407(5) | C(10)-C(11)            | 1.378(5) |
| C(10)-H(10A)          | 0.9500   | C(11)-C(12)            | 1.400(6) |
| C(11)-H(11A)          | 0.9500   | C(12)-N(12)            | 1.367(4) |
| C(12)-C(13)           | 1.406(5) | N(12)-C(12A)           | 1.443(5) |
| N(12)-H(12)           | 0.8800   | C(12A)-H(12A)          | 0.9800   |
| C(12A)-H(12B)         | 0.9800   | C(12A)-H(12C)          | 0.9800   |
| C(13)-C(14)           | 1.373(4) | C(13)-H(13A)           | 0.9500   |
| C(14)-H(14A)          | 0.9500   |                        |          |
| O(1)-N(1)-N(2)        | 127.5(3) | O(1)-N(1)-N(3)         | 117.5(3) |
| N(2)-N(1)-N(3)        | 114.9(3) | N(1)-N(2)-O(2)         | 105.0(2) |
| C(1)-O(2)-N(2)        | 111.0(2) | N(1)-N(3)-C(3'')       | 111.7(3) |
| N(1)-N(3)-C(3')       | 113.9(3) | C(3'')-N(3)-C(3')      | 116.7(3) |
| N(3)-C(3')-H(3'A)     | 109.5    | N(3)-C(3')-H(3'B)      | 109.5    |
| H(3'A)-C(3')-H(3'B)   | 109.5    | N(3)-C(3')-H(3'C)      | 109.5    |
| H(3'A)-C(3')-H(3'C)   | 109.5    | H(3'B)-C(3')-H(3'C)    | 109.5    |
| N(3)-C(3'')-H(3'A)    | 109.5    | N(3)-C(3'')-H(3''B)    | 109.5    |
| H(3'A)-C(3'')-H(3''B) | 109.5    | N(3)-C(3'')-H(3''C)    | 109.5    |
| H(3'A)-C(3'')-H(3''C) | 109.5    | H(3''B)-C(3'')-H(3''C) | 109.5    |
| O(2)-C(1)-C(6)        | 123.4(3) | O(2)-C(1)-C(2)         | 118.8(3) |
| C(6)-C(1)-C(2)        | 117.8(3) | C(3)-C(2)-C(1)         | 121.4(3) |
| C(3)-C(2)-N(2')       | 116.0(3) | C(1)-C(2)-N(2')        | 122.6(3) |
| O(2'')-N(2')-O(2')    | 123.7(3) | O(2'')-N(2')-C(2)      | 117.5(3) |
| O(2')-N(2')-C(2)      | 118.8(3) | C(4)-C(3)-C(2)         | 119.8(3) |
| C(4)-C(3)-H(3A)       | 120.1    | C(2)-C(3)-H(3A)        | 120.1    |
| C(3)-C(4)-C(5)        | 119.4(3) | C(3)-C(4)-N(4)         | 117.5(3) |
| C(5)-C(4)-N(4)        | 123.1(3) | O(4')-N(4)-O(4)        | 123.4(3) |
| O(4')-N(4)-C(4)       | 118.3(3) | O(4)-N(4)-C(4)         | 118.3(3) |
| C(6)-C(5)-O(7)        | 116.1(3) | C(6)-C(5)-C(4)         | 120.1(3) |
| O(7)-C(5)-C(4)        | 123.8(3) | C(5)-C(6)-C(1)         | 121.3(3) |

**Table S3.** (continued).

|                      |          |                      |          |
|----------------------|----------|----------------------|----------|
| C(5)-C(6)-H(6A)      | 119.3    | C(1)-C(6)-H(6A)      | 119.3    |
| C(5)-O(7)-C(8)       | 116.4(3) | O(8)-C(8)-O(7)       | 121.3(3) |
| O(8)-C(8)-C(9)       | 127.0(3) | O(7)-C(8)-C(9)       | 111.7(3) |
| C(10)-C(9)-C(14)     | 118.5(3) | C(10)-C(9)-C(8)      | 124.0(3) |
| C(14)-C(9)-C(8)      | 117.4(3) | C(11)-C(10)-C(9)     | 120.8(4) |
| C(11)-C(10)-H(10A)   | 119.6    | C(9)-C(10)-H(10A)    | 119.6    |
| C(10)-C(11)-C(12)    | 120.6(4) | C(10)-C(11)-H(11A)   | 119.7    |
| C(12)-C(11)-H(11A)   | 119.7    | N(12)-C(12)-C(11)    | 122.5(4) |
| N(12)-C(12)-C(13)    | 118.6(4) | C(11)-C(12)-C(13)    | 118.9(3) |
| C(12)-N(12)-C(12A)   | 124.0(4) | C(12)-N(12)-H(12)    | 118.0    |
| C(12A)-N(12)-H(12)   | 118.0    | N(12)-C(12A)-H(12A)  | 109.5    |
| N(12)-C(12A)-H(12B)  | 109.5    | H(12A)-C(12A)-H(12B) | 109.5    |
| N(12)-C(12A)-H(12C)  | 109.5    | H(12A)-C(12A)-H(12C) | 109.5    |
| H(12B)-C(12A)-H(12C) | 109.5    | C(14)-C(13)-C(12)    | 120.1(4) |
| C(14)-C(13)-H(13A)   | 119.9    | C(12)-C(13)-H(13A)   | 119.9    |
| C(13)-C(14)-C(9)     | 121.0(3) | C(13)-C(14)-H(14A)   | 119.5    |
| C(9)-C(14)-H(14A)    | 119.5    |                      |          |



**Table S4.** Anisotropic displacement parameters ( $\text{\AA}^2 \times 10^3$ ) for **6a**. The anisotropic displacement factor exponent takes the form:  $-2\pi^2 [ h^2 a^{*2} U^{11} + \dots + 2 h k a^* b^* U^{12} ]$

|        | $U^{11}$ | $U^{22}$ | $U^{33}$ | $U^{23}$ | $U^{13}$ | $U^{12}$ |
|--------|----------|----------|----------|----------|----------|----------|
| N(1)   | 31(2)    | 27(2)    | 45(2)    | 4(2)     | 16(2)    | -1(2)    |
| O(1)   | 41(2)    | 56(2)    | 75(2)    | 25(2)    | 35(2)    | 15(2)    |
| N(2)   | 33(2)    | 32(2)    | 36(2)    | 9(2)     | 14(1)    | 1(2)     |
| O(2)   | 31(1)    | 38(2)    | 46(2)    | 17(1)    | 19(1)    | 5(1)     |
| N(3)   | 49(2)    | 35(2)    | 37(2)    | 7(2)     | 18(2)    | 0(2)     |
| C(3')  | 48(2)    | 42(3)    | 33(2)    | 3(2)     | 21(2)    | 7(2)     |
| C(3'') | 45(2)    | 39(3)    | 32(2)    | 7(2)     | 13(2)    | 12(2)    |
| C(1)   | 29(2)    | 24(2)    | 41(2)    | 2(2)     | 14(2)    | -4(2)    |
| C(2)   | 27(2)    | 26(2)    | 39(2)    | 3(2)     | 18(2)    | -1(2)    |
| N(2')  | 35(2)    | 49(2)    | 46(2)    | 9(2)     | 23(2)    | 0(2)     |
| O(2')  | 35(2)    | 139(4)   | 73(2)    | 53(2)    | 32(2)    | 26(2)    |
| O(2'') | 37(2)    | 94(3)    | 45(2)    | -2(2)    | 22(1)    | 4(2)     |
| C(3)   | 39(2)    | 25(2)    | 35(2)    | -2(2)    | 21(2)    | -6(2)    |
| C(4)   | 27(2)    | 23(2)    | 36(2)    | 0(2)     | 15(2)    | 0(2)     |
| N(4)   | 36(2)    | 30(2)    | 37(2)    | 0(2)     | 22(2)    | 2(2)     |
| O(4)   | 49(2)    | 50(2)    | 34(2)    | 8(2)     | 21(1)    | 10(2)    |
| O(4')  | 44(2)    | 38(2)    | 48(2)    | 7(1)     | 28(1)    | 14(1)    |
| C(5)   | 26(2)    | 23(2)    | 33(2)    | -4(2)    | 16(2)    | -3(2)    |
| C(6)   | 33(2)    | 22(2)    | 38(2)    | 3(2)     | 20(2)    | -2(2)    |
| O(7)   | 29(1)    | 34(2)    | 34(1)    | -1(1)    | 17(1)    | 2(1)     |
| C(8)   | 30(2)    | 27(2)    | 27(2)    | 4(2)     | 12(2)    | 3(2)     |
| O(8)   | 39(1)    | 38(2)    | 36(1)    | -7(1)    | 21(1)    | -5(1)    |
| C(9)   | 31(2)    | 21(2)    | 36(2)    | 9(2)     | 16(2)    | 7(2)     |
| C(10)  | 44(2)    | 27(2)    | 43(2)    | -2(2)    | 25(2)    | -1(2)    |
| C(11)  | 56(3)    | 38(3)    | 41(2)    | 1(2)     | 30(2)    | 4(2)     |
| C(12)  | 47(2)    | 39(3)    | 46(2)    | 6(2)     | 30(2)    | 8(2)     |
| N(12)  | 63(2)    | 68(3)    | 59(2)    | -12(2)   | 44(2)    | -14(2)   |
| C(12A) | 93(4)    | 74(4)    | 76(3)    | -24(3)   | 66(3)    | -25(3)   |
| C(13)  | 28(2)    | 39(3)    | 42(2)    | 7(2)     | 13(2)    | -2(2)    |
| C(14)  | 34(2)    | 33(3)    | 33(2)    | 11(2)    | 16(2)    | 8(2)     |

**Table S5.** Hydrogen coordinates ( $\times 10^4$ ) and isotropic displacement parameters ( $\text{\AA}^2 \times 10^3$ ) for **6a**.

|         | x     | y     | z    | U(eq) |
|---------|-------|-------|------|-------|
| H(3'A)  | 10509 | -1149 | 4814 | 59    |
| H(3'B)  | 10968 | -2569 | 5485 | 59    |
| H(3'C)  | 10326 | -3116 | 4584 | 59    |
| H(3''A) | 12914 | -3785 | 4779 | 59    |
| H(3''B) | 11859 | -4789 | 4561 | 59    |
| H(3''C) | 12501 | -4243 | 5463 | 59    |
| H(3A)   | 9013  | 2391  | 736  | 37    |
| H(6A)   | 9217  | 439   | 3219 | 35    |
| H(10A)  | 6732  | 2232  | 3455 | 43    |
| H(11A)  | 5519  | 2205  | 4026 | 50    |
| H(12)   | 3102  | 357   | 3169 | 69    |
| H(12A)  | 3182  | 1387  | 4310 | 106   |
| H(12B)  | 3934  | 2798  | 4205 | 106   |
| H(12C)  | 4384  | 1032  | 4628 | 106   |
| H(13A)  | 3575  | -393  | 2115 | 43    |
| H(14A)  | 4798  | -380  | 1556 | 39    |

**Table S6.** Torsion angles [°] for **6a**.

|                          |           |                          |           |
|--------------------------|-----------|--------------------------|-----------|
| O(1)-N(1)-N(2)-O(2)      | -1.9(5)   | N(3)-N(1)-N(2)-O(2)      | 175.3(3)  |
| N(1)-N(2)-O(2)-C(1)      | 175.2(3)  | O(1)-N(1)-N(3)-C(3'')    | -38.8(5)  |
| N(2)-N(1)-N(3)-C(3'')    | 143.6(3)  | O(1)-N(1)-N(3)-C(3')     | -173.7(3) |
| N(2)-N(1)-N(3)-C(3')     | 8.8(5)    | N(2)-O(2)-C(1)-C(6)      | 7.2(5)    |
| N(2)-O(2)-C(1)-C(2)      | -170.5(3) | O(2)-C(1)-C(2)-C(3)      | -179.8(4) |
| C(6)-C(1)-C(2)-C(3)      | 2.5(6)    | O(2)-C(1)-C(2)-N(2')     | 2.2(6)    |
| C(6)-C(1)-C(2)-N(2')     | -175.6(4) | C(3)-C(2)-N(2')-O(2'')   | -14.3(6)  |
| C(1)-C(2)-N(2')-O(2'')   | 163.9(4)  | C(3)-C(2)-N(2')-O(2')    | 166.4(4)  |
| C(1)-C(2)-N(2')-O(2')    | -15.4(6)  | C(1)-C(2)-C(3)-C(4)      | -0.1(6)   |
| N(2')-C(2)-C(3)-C(4)     | 178.1(3)  | C(2)-C(3)-C(4)-C(5)      | -2.4(6)   |
| C(2)-C(3)-C(4)-N(4)      | 177.8(3)  | C(3)-C(4)-N(4)-O(4')     | -153.9(3) |
| C(5)-C(4)-N(4)-O(4')     | 26.4(5)   | C(3)-C(4)-N(4)-O(4)      | 24.6(5)   |
| C(5)-C(4)-N(4)-O(4)      | -155.1(3) | C(3)-C(4)-C(5)-C(6)      | 2.6(6)    |
| N(4)-C(4)-C(5)-C(6)      | -177.7(3) | C(3)-C(4)-C(5)-O(7)      | -178.1(3) |
| N(4)-C(4)-C(5)-O(7)      | 1.6(6)    | O(7)-C(5)-C(6)-C(1)      | -179.5(3) |
| C(4)-C(5)-C(6)-C(1)      | -0.2(6)   | O(2)-C(1)-C(6)-C(5)      | -180.0(4) |
| C(2)-C(1)-C(6)-C(5)      | -2.3(6)   | C(6)-C(5)-O(7)-C(8)      | -117.0(4) |
| C(4)-C(5)-O(7)-C(8)      | 63.6(5)   | C(5)-O(7)-C(8)-O(8)      | -5.0(5)   |
| C(5)-O(7)-C(8)-C(9)      | 174.0(3)  | O(8)-C(8)-C(9)-C(10)     | 175.4(4)  |
| O(7)-C(8)-C(9)-C(10)     | -3.5(5)   | O(8)-C(8)-C(9)-C(14)     | -2.7(6)   |
| O(7)-C(8)-C(9)-C(14)     | 178.5(3)  | C(14)-C(9)-C(10)-C(11)   | -0.5(6)   |
| C(8)-C(9)-C(10)-C(11)    | -178.6(4) | C(9)-C(10)-C(11)-C(12)   | -0.1(6)   |
| C(10)-C(11)-C(12)-N(12)  | 179.7(4)  | C(10)-C(11)-C(12)-C(13)  | 0.4(6)    |
| C(11)-C(12)-N(12)-C(12A) | -0.4(7)   | C(13)-C(12)-N(12)-C(12A) | 178.9(4)  |
| N(12)-C(12)-C(13)-C(14)  | -179.4(4) | C(11)-C(12)-C(13)-C(14)  | -0.1(6)   |
| C(12)-C(13)-C(14)-C(9)   | -0.5(6)   | C(10)-C(9)-C(14)-C(13)   | 0.9(6)    |
| C(8)-C(9)-C(14)-C(13)    | 179.0(4)  |                          |           |

**Table S7.** Crystal data and structure refinement for **6c**.

|                                        |                                             |                            |
|----------------------------------------|---------------------------------------------|----------------------------|
| Empirical formula                      | $C_{15}H_{13}N_6O_8$                        |                            |
| Formula weight                         | 405.31                                      |                            |
| Temperature                            | 293(2) °K                                   |                            |
| Wavelength                             | 1.54178 Å                                   |                            |
| Crystal system                         | Triclinic                                   |                            |
| Space group                            | P -1                                        |                            |
| Unit cell dimensions                   | $a = 11.2367(11)$ Å                         | $\alpha = 89.451(5)^\circ$ |
|                                        | $b = 12.8743(10)$ Å                         | $\beta = 88.172(6)^\circ$  |
|                                        | $c = 25.143(2)$ Å                           | $\gamma = 87.516(5)^\circ$ |
| Volume                                 | $3631.9(6)$ Å <sup>3</sup>                  |                            |
| Z                                      | 8                                           |                            |
| Density (calculated)                   | 1.483 Mg/m <sup>3</sup>                     |                            |
| Absorption coefficient                 | 1.063 mm <sup>-1</sup>                      |                            |
| F(000)                                 | 1672                                        |                            |
| Crystal size                           | 0.36 x 0.06 x 0.04 mm <sup>3</sup>          |                            |
| $\theta$ range for data collection     | 1.76 to 67.20°                              |                            |
| Index ranges                           | -12 ≤ h ≤ 12, -15 ≤ k ≤ 14, -25 ≤ l ≤ 29    |                            |
| Reflections collected                  | 18729                                       |                            |
| Independent reflections                | 10961 [R(int) = 0.0415]                     |                            |
| Completeness to $\theta = 67.20^\circ$ | 84.2 %                                      |                            |
| Absorption correction                  | Semi-empirical from equivalent              |                            |
| Max. and min. transmission             | 0.958 and 0.682                             |                            |
| Refinement method                      | Full-matrix least-squares on F <sup>2</sup> |                            |
| Data / restraints / parameters         | 10961 / 9 / 1130                            |                            |
| Goodness-of-fit on F <sup>2</sup>      | 1.033                                       |                            |
| Final R indices [ $I > 2s(I)$ ]        | R1 = 0.0857, wR2 = 0.2660                   |                            |
| R indices (all data)                   | R1 = 0.1318, wR2 = 0.3146                   |                            |
| Extinction coefficient                 | 0.0026(4)                                   |                            |
| Largest diff. peak and hole            | 1.320 and -1.142 e.Å <sup>-3</sup>          |                            |

**Table S8.** Atomic coordinates ( $\times 10^4$ ) and equivalent isotropic displacement parameters ( $\text{\AA}^2 \times 10^3$ ) for **6c**.  $U(\text{eq})$  is defined as one third of the trace of the orthogonalized  $U_{ij}$  tensor.

|         | x         | y        | z        | U(eq)   |
|---------|-----------|----------|----------|---------|
| C(9)    | -2378(5)  | -1593(4) | 3498(2)  | 79(2)   |
| C(10)   | -2752(5)  | -2534(4) | 3315(2)  | 75(1)   |
| O(15)   | -4209(4)  | -3372(3) | 2825(2)  | 102(1)  |
| C(14)   | -3800(5)  | -2514(5) | 2973(2)  | 82(2)   |
| O(14)   | -4257(4)  | -1641(3) | 2846(2)  | 114(2)  |
| C(11)   | -2138(5)  | -3456(4) | 3443(2)  | 83(2)   |
| C(12)   | -1165(5)  | -3450(4) | 3751(2)  | 83(2)   |
| C(13)   | -762(5)   | -2516(4) | 3927(2)  | 84(2)   |
| C(8)    | -1371(6)  | -1584(4) | 3803(2)  | 84(2)   |
| N(7)    | -957(5)   | -651(4)  | 4009(2)  | 107(2)  |
| C(5)    | -933(5)   | 316(4)   | 3791(2)  | 87(2)   |
| C(4)    | -658(8)   | 1207(5)  | 4060(2)  | 119(3)  |
| O(4')   | -667(15)  | 351(6)   | 4878(3)  | 690(20) |
| O(4)    | -150(6)   | 1889(4)  | 4852(2)  | 168(3)  |
| N(4)    | -460(5)   | 1128(4)  | 4632(2)  | 233(6)  |
| C(3)    | -620(6)   | 2178(4)  | 3818(2)  | 97(2)   |
| C(2)    | -894(5)   | 2290(4)  | 3307(2)  | 77(1)   |
| O(2'')  | -916(7)   | 4057(4)  | 3391(2)  | 161(3)  |
| N(2')   | -909(5)   | 3342(4)  | 3097(3)  | 105(2)  |
| C(1)    | -1160(5)  | 1425(4)  | 3006(2)  | 72(1)   |
| O(2')   | -882(7)   | 3462(4)  | 2623(3)  | 175(3)  |
| C(6)    | -1170(5)  | 457(4)   | 3243(2)  | 71(1)   |
| O(2)    | -1428(4)  | 1600(3)  | 2486(1)  | 85(1)   |
| N(2)    | -1781(5)  | 690(3)   | 2246(2)  | 91(2)   |
| N(1)    | -2009(5)  | 937(4)   | 1767(2)  | 97(2)   |
| O(1)    | -1894(5)  | 1782(4)  | 1554(2)  | 127(2)  |
| N(3')   | -1980(40) | 40(20)   | 1448(6)  | 115(9)  |
| C(3'')  | -2100(70) | -880(20) | 1731(12) | 180(17) |
| C(3''') | -2650(30) | 370(30)  | 968(11)  | 98(7)   |
| N(3)    | -2770(40) | 234(14)  | 1505(7)  | 103(8)  |
| C(3')   | -2980(30) | -720(20) | 1765(10) | 123(10) |
| C(3'')  | -2470(40) | 100(40)  | 901(15)  | 165(18) |
| C(9A)   | 2240(5)   | -1320(4) | 1485(2)  | 69(1)   |
| C(10A)  | 2598(5)   | -2298(4) | 1667(2)  | 70(1)   |
| O(14A)  | 4119(4)   | -1565(3) | 2144(2)  | 107(1)  |
| C(14A)  | 3659(5)   | -2405(4) | 2008(2)  | 77(1)   |
| O(15A)  | 4031(4)   | -3287(3) | 2160(2)  | 102(1)  |
| C(11A)  | 1984(5)   | -3161(4) | 1543(2)  | 76(1)   |
| C(12A)  | 989(6)    | -3033(4) | 1229(2)  | 86(2)   |
| C(13A)  | 614(5)    | -2066(4) | 1058(2)  | 76(1)   |
| C(8A)   | 1237(5)   | -1195(4) | 1179(2)  | 72(1)   |
| N(7A)   | 865(4)    | -227(3)  | 966(2)   | 77(1)   |

**Table S8.** (continued).

|        |          |          |         |        |
|--------|----------|----------|---------|--------|
| C(5A)  | 943(5)   | 723(3)   | 1193(2) | 65(1)  |
| C(4A)  | 810(4)   | 1669(3)  | 901(2)  | 66(1)  |
| N(4A)  | 590(4)   | 1711(3)  | 341(2)  | 80(1)  |
| O(4'A) | 231(5)   | 931(3)   | 132(2)  | 129(2) |
| O(4A)  | 779(4)   | 2487(3)  | 87(2)   | 103(1) |
| C(3A)  | 929(4)   | 2614(4)  | 1138(2) | 67(1)  |
| C(2A)  | 1187(5)  | 2678(3)  | 1666(2) | 66(1)  |
| N(2'A) | 1381(5)  | 3696(3)  | 1871(2) | 88(1)  |
| O(2"A) | 1213(6)  | 4444(3)  | 1595(2) | 133(2) |
| C(1A)  | 1329(4)  | 1756(4)  | 1969(2) | 65(1)  |
| O(2'A) | 1770(8)  | 3789(4)  | 2294(2) | 190(4) |
| C(6A)  | 1171(4)  | 822(4)   | 1733(2) | 65(1)  |
| O(2A)  | 1604(3)  | 1851(3)  | 2489(1) | 76(1)  |
| N(2A)  | 1748(4)  | 862(3)   | 2729(2) | 81(1)  |
| N(1A)  | 2106(5)  | 1018(4)  | 3198(2) | 86(1)  |
| O(1A)  | 2316(5)  | 1850(4)  | 3391(2) | 134(2) |
| N(3A)  | 2155(7)  | 123(5)   | 3511(2) | 128(2) |
| C(3"A) | 2994(10) | 133(9)   | 3910(4) | 201(6) |
| C(3'A) | 1998(9)  | -833(6)  | 3231(3) | 149(3) |
| C(9B)  | 6494(5)  | 2928(4)  | 4039(2) | 71(1)  |
| C(10B) | 6081(5)  | 2012(4)  | 3820(2) | 74(1)  |
| O(14B) | 5684(5)  | 2872(3)  | 3004(2) | 108(2) |
| C(14B) | 5716(5)  | 2027(4)  | 3253(2) | 82(2)  |
| O(15B) | 5494(5)  | 1161(3)  | 3050(2) | 106(1) |
| C(11B) | 6023(6)  | 1126(4)  | 4123(2) | 87(2)  |
| C(12B) | 6339(6)  | 1130(4)  | 4644(2) | 96(2)  |
| C(13B) | 6752(6)  | 2024(4)  | 4859(2) | 88(2)  |
| C(8B)  | 6834(5)  | 2918(4)  | 4561(2) | 76(1)  |
| N(7B)  | 7351(4)  | 3768(3)  | 4802(2) | 84(1)  |
| C(5B)  | 7028(5)  | 4790(4)  | 4780(2) | 76(1)  |
| C(4B)  | 7656(5)  | 5567(4)  | 5043(2) | 77(1)  |
| O(4'B) | 9049(5)  | 4392(4)  | 5401(2) | 127(2) |
| O(4B)  | 9143(5)  | 5990(4)  | 5593(2) | 142(2) |
| N(4B)  | 8680(5)  | 5293(5)  | 5368(2) | 101(2) |
| C(3B)  | 7337(5)  | 6587(4)  | 5004(2) | 80(2)  |
| C(2B)  | 6385(5)  | 6928(4)  | 4707(2) | 77(2)  |
| N(2'B) | 6150(5)  | 8047(3)  | 4666(2) | 95(2)  |
| O(2"B) | 6679(6)  | 8609(3)  | 4953(2) | 139(2) |
| C(1B)  | 5725(5)  | 6178(4)  | 4453(2) | 71(1)  |
| O(2'B) | 5453(4)  | 8376(3)  | 4333(2) | 101(1) |
| C(6B)  | 6029(5)  | 5152(4)  | 4496(2) | 69(1)  |
| O(2B)  | 4736(4)  | 6542(3)  | 4189(2) | 88(1)  |
| N(2B)  | 4228(5)  | 5715(3)  | 3919(2) | 90(2)  |
| O(1B)  | 2863(5)  | 6990(3)  | 3782(2) | 133(2) |
| N(1B)  | 3258(5)  | 6096(4)  | 3727(2) | 93(2)  |
| N(3B)  | 2517(18) | 5338(14) | 3518(7) | 100(4) |

**Table S8.** (continued).

|        |          |          |          |         |
|--------|----------|----------|----------|---------|
| C(3'B) | 3320(30) | 4460(20) | 3331(14) | 188(14) |
| C(3"B) | 1670(20) | 5760(15) | 3130(8)  | 96(6)   |
| N(3'B) | 2980(60) | 5630(40) | 3300(30) | 110(18) |
| C(3'E) | 3040(40) | 4270(30) | 3385(18) | 71(10)  |
| C(3"E) | 1910(60) | 5890(50) | 3120(20) | 130(20) |
| C(9C)  | 3874(5)  | 3011(4)  | 1033(2)  | 73(1)   |
| C(10C) | 4246(5)  | 2075(4)  | 1270(2)  | 75(1)   |
| O(14C) | 4791(5)  | 2918(3)  | 2049(2)  | 110(2)  |
| C(14C) | 4643(5)  | 2063(4)  | 1827(2)  | 79(2)   |
| O(15C) | 4801(5)  | 1206(3)  | 2060(2)  | 115(2)  |
| C(11C) | 4243(5)  | 1154(4)  | 985(2)   | 80(2)   |
| C(12C) | 3890(5)  | 1176(4)  | 465(2)   | 86(2)   |
| C(13C) | 3532(5)  | 2099(4)  | 231(2)   | 78(1)   |
| C(8C)  | 3507(5)  | 3023(4)  | 515(2)   | 71(1)   |
| N(7C)  | 2992(4)  | 3913(3)  | 254(2)   | 81(1)   |
| C(5C)  | 3240(5)  | 4930(4)  | 294(2)   | 73(1)   |
| C(4C)  | 2582(5)  | 5720(4)  | 16(2)    | 78(2)   |
| N(4C)  | 1628(5)  | 5505(4)  | -324(2)  | 101(2)  |
| O(4'C) | 1283(5)  | 4611(4)  | -360(2)  | 123(2)  |
| O(4C)  | 1174(5)  | 6216(4)  | -580(2)  | 150(2)  |
| C(3C)  | 2855(5)  | 6746(4)  | 61(2)    | 81(2)   |
| C(2C)  | 3748(6)  | 7043(4)  | 370(2)   | 79(2)   |
| O(2"C) | 3297(5)  | 8738(3)  | 148(2)   | 125(2)  |
| N(2'C) | 3936(5)  | 8155(3)  | 415(2)   | 90(1)   |
| C(1C)  | 4482(5)  | 6269(4)  | 623(2)   | 73(1)   |
| O(2'C) | 4633(4)  | 8458(3)  | 728(2)   | 101(1)  |
| C(6C)  | 4202(5)  | 5250(4)  | 580(2)   | 72(1)   |
| O(2C)  | 5413(4)  | 6590(3)  | 897(2)   | 87(1)   |
| N(2C)  | 5962(5)  | 5747(4)  | 1171(2)  | 97(2)   |
| O(1C)  | 7260(5)  | 6970(4)  | 1308(3)  | 155(3)  |
| N(1C)  | 6884(5)  | 6096(4)  | 1374(2)  | 100(2)  |
| N(3C)  | 7310(30) | 5490(30) | 1789(18) | 111(9)  |
| C(3'C) | 6900(50) | 4470(30) | 1776(19) | 170(20) |
| C(3"C) | 8290(40) | 5780(30) | 1980(15) | 134(13) |
| N(3'C) | 7710(40) | 5344(15) | 1576(14) | 98(8)   |
| C(3'F) | 7170(50) | 4330(30) | 1741(17) | 131(13) |
| C(3"F) | 8550(30) | 5690(30) | 1925(17) | 136(14) |

**Table S9.** Bond lengths [Å] and angles [°] for **6c**.

|                |            |                |            |
|----------------|------------|----------------|------------|
| C(9)-C(10)     | 1.387(7)   | C(9)-C(8)      | 1.388(7)   |
| C(9)-H(9)      | 0.9300     | C(10)-C(11)    | 1.387(7)   |
| C(10)-C(14)    | 1.479(7)   | O(15)-C(14)    | 1.277(7)   |
| C(14)-O(14)    | 1.258(6)   | C(11)-C(12)    | 1.361(7)   |
| C(11)-H(11)    | 0.9300     | C(12)-C(13)    | 1.385(7)   |
| C(12)-H(12)    | 0.9300     | C(13)-C(8)     | 1.393(7)   |
| C(13)-H(13)    | 0.9300     | C(8)-N(7)      | 1.416(7)   |
| N(7)-C(5)      | 1.356(7)   | N(7)-H(7)      | 0.8600     |
| C(5)-C(4)      | 1.389(7)   | C(5)-C(6)      | 1.421(6)   |
| C(4)-C(3)      | 1.387(8)   | C(4)-N(4)      | 1.463(6)   |
| O(4')-N(4)     | 1.1990(11) | O(4)-N(4)      | 1.1997(10) |
| C(3)-C(2)      | 1.335(7)   | C(3)-H(3)      | 0.9300     |
| C(2)-C(1)      | 1.401(7)   | C(2)-N(2')     | 1.448(7)   |
| O(2'')-N(2')   | 1.186(7)   | N(2')-O(2')    | 1.202(7)   |
| C(1)-O(2)      | 1.366(6)   | C(1)-C(6)      | 1.376(7)   |
| C(6)-H(6)      | 0.9300     | O(2)-N(2)      | 1.401(5)   |
| N(2)-N(1)      | 1.273(6)   | N(1)-O(1)      | 1.218(6)   |
| N(1)-N(3')     | 1.41(2)    | N(1)-N(3)      | 1.45(2)    |
| N(3')-C(3'')   | 1.39(3)    | N(3')-C(3''')  | 1.49(4)    |
| C(3'')-H(3AA)  | 0.9600     | C(3'')-H(3AB)  | 0.9600     |
| C(3'')-H(3AC)  | 0.9600     | C(3''')-H(3AD) | 0.9600     |
| C(3''')-H(3AE) | 0.9600     | C(3''')-H(3AF) | 0.9600     |
| N(3)-C(3')     | 1.41(3)    | N(3)-C(3'')    | 1.56(5)    |
| C(3')-H(3'A)   | 0.9600     | C(3')-H(3'B)   | 0.9600     |
| C(3')-H(3'C)   | 0.9600     | C(3'')-H(3'A)  | 0.9600     |
| C(3'')-H(3'B)  | 0.9600     | C(3'')-H(3'C)  | 0.9600     |
| C(9A)-C(10A)   | 1.382(6)   | C(9A)-C(8A)    | 1.389(7)   |
| C(9A)-H(9A)    | 0.9300     | C(10A)-C(11A)  | 1.377(7)   |
| C(10A)-C(14A)  | 1.491(7)   | O(14A)-C(14A)  | 1.273(6)   |
| C(14A)-O(15A)  | 1.254(6)   | C(11A)-C(12A)  | 1.392(7)   |
| C(11A)-H(11A)  | 0.9300     | C(12A)-C(13A)  | 1.367(7)   |
| C(12A)-H(12A)  | 0.9300     | C(13A)-C(8A)   | 1.389(7)   |
| C(13A)-H(13A)  | 0.9300     | C(8A)-N(7A)    | 1.405(6)   |
| N(7A)-C(5A)    | 1.362(5)   | N(7A)-H(7A)    | 0.8600     |
| C(5A)-C(6A)    | 1.398(6)   | C(5A)-C(4A)    | 1.421(6)   |
| C(4A)-C(3A)    | 1.373(6)   | C(4A)-N(4A)    | 1.437(6)   |
| N(4A)-O(4A)    | 1.204(5)   | N(4A)-O(4'A)   | 1.229(5)   |
| C(3A)-C(2A)    | 1.371(6)   | C(3A)-H(3A)    | 0.9300     |
| C(2A)-C(1A)    | 1.411(6)   | C(2A)-N(2'A)   | 1.441(6)   |
| N(2'A)-O(2'A)  | 1.172(6)   | N(2'A)-O(2''A) | 1.193(6)   |
| C(1A)-O(2A)    | 1.361(5)   | C(1A)-C(6A)    | 1.367(6)   |
| C(6A)-H(6A)    | 0.9300     | O(2A)-N(2A)    | 1.409(5)   |
| N(2A)-N(1A)    | 1.279(5)   | N(1A)-O(1A)    | 1.215(6)   |
| N(1A)-N(3A)    | 1.389(7)   | N(3A)-C(3'A)   | 1.399(8)   |
| N(3A)-C(3'A)   | 1.443(9)   | C(3'A)-H(3AG)  | 0.9600     |
| C(3'A)-H(3AH)  | 0.9600     | C(3'A)-H(3AI)  | 0.9600     |



Table S9. (continued)

|                |           |                |          |
|----------------|-----------|----------------|----------|
| C(3'A)-H(3AJ)  | 0.9600    | C(3'A)-H(3AK)  | 0.9600   |
| C(3'A)-H(3AL)  | 0.9600    | C(9B)-C(8B)    | 1.377(6) |
| C(9B)-C(10B)   | 1.408(7)  | C(9B)-H(9B)    | 0.9300   |
| C(10B)-C(11B)  | 1.369(7)  | C(10B)-C(14B)  | 1.496(7) |
| O(14B)-C(14B)  | 1.250(6)  | C(14B)-O(15B)  | 1.269(6) |
| C(11B)-C(12B)  | 1.368(7)  | C(11B)-H(11B)  | 0.9300   |
| C(12B)-C(13B)  | 1.381(7)  | C(12B)-H(12B)  | 0.9300   |
| C(13B)-C(8B)   | 1.373(7)  | C(13B)-H(13B)  | 0.9300   |
| C(8B)-N(7B)    | 1.412(6)  | N(7B)-C(5B)    | 1.351(6) |
| N(7B)-H(7B)    | 0.8600    | C(5B)-C(6B)    | 1.409(7) |
| C(5B)-C(4B)    | 1.427(7)  | C(4B)-C(3B)    | 1.350(7) |
| C(4B)-N(4B)    | 1.461(7)  | O(4'B)-N(4B)   | 1.219(6) |
| O(4B)-N(4B)    | 1.211(6)  | C(3B)-C(2B)    | 1.377(7) |
| C(3B)-H(3B)    | 0.9300    | C(2B)-C(1B)    | 1.413(7) |
| C(2B)-N(2'B)   | 1.457(6)  | N(2'B)-O(2''B) | 1.214(6) |
| N(2'B)-O(2'B)  | 1.224(6)  | C(1B)-C(6B)    | 1.354(7) |
| C(1B)-O(2B)    | 1.375(6)  | C(6B)-H(6B)    | 0.9300   |
| O(2B)-N(2B)    | 1.418(5)  | N(2B)-N(1B)    | 1.283(6) |
| O(1B)-N(1B)    | 1.223(6)  | N(1B)-N(3'B)   | 1.28(4)  |
| N(1B)-N(3B)    | 1.425(18) | N(3B)-C(3''B)  | 1.47(3)  |
| N(3B)-C(3'B)   | 1.48(3)   | C(3'B)-H(3BA)  | 0.9600   |
| C(3'B)-H(3BB)  | 0.9600    | C(3'B)-H(3BC)  | 0.9600   |
| C(3''B)-H(3BD) | 0.9600    | C(3''B)-H(3BE) | 0.9600   |
| C(3''B)-H(3BF) | 0.9600    | N(3'B)-C(3'E)  | 1.33(7)  |
| N(3'B)-C(3'E)  | 1.76(6)   | C(3'E)-H(3BG)  | 0.9600   |
| C(3'E)-H(3BH)  | 0.9600    | C(3'E)-H(3BI)  | 0.9600   |
| C(3''E)-H(3BJ) | 0.9600    | C(3''E)-H(3BK) | 0.9600   |
| C(3''E)-H(3BL) | 0.9600    | C(9C)-C(8C)    | 1.378(7) |
| C(9C)-C(10C)   | 1.394(7)  | C(9C)-H(9C)    | 0.9300   |
| C(10C)-C(11C)  | 1.391(7)  | C(10C)-C(14C)  | 1.483(7) |
| O(14C)-C(14C)  | 1.260(6)  | C(14C)-O(15C)  | 1.253(6) |
| C(11C)-C(12C)  | 1.378(7)  | C(11C)-H(11C)  | 0.9300   |
| C(12C)-C(13C)  | 1.371(7)  | C(12C)-H(12C)  | 0.9300   |
| C(13C)-C(8C)   | 1.391(7)  | C(13C)-H(13C)  | 0.9300   |
| C(8C)-N(7C)    | 1.426(6)  | N(7C)-C(5C)    | 1.356(6) |
| N(7C)-H(7C)    | 0.8600    | C(5C)-C(6C)    | 1.396(7) |
| C(5C)-C(4C)    | 1.423(7)  | C(4C)-C(3C)    | 1.375(7) |
| C(4C)-N(4C)    | 1.431(7)  | N(4C)-O(4C)    | 1.217(6) |
| N(4C)-O(4'C)   | 1.235(6)  | C(3C)-C(2C)    | 1.359(8) |
| C(3C)-H(3C)    | 0.9300    | C(2C)-C(1C)    | 1.424(7) |
| C(2C)-N(2'C)   | 1.463(7)  | O(2''C)-N(2'C) | 1.227(6) |
| N(2'C)-O(2'C)  | 1.207(6)  | C(1C)-O(2C)    | 1.352(6) |
| C(1C)-C(6C)    | 1.368(7)  | C(6C)-H(6C)    | 0.9300   |
| O(2C)-N(2C)    | 1.411(6)  | N(2C)-N(1C)    | 1.270(7) |
| O(1C)-N(1C)    | 1.227(6)  | N(1C)-N(3C)    | 1.38(2)  |
| N(1C)-N(3'C)   | 1.41(2)   | N(3C)-C(3''C)  | 1.28(4)  |

Table S9. (continued)

|                       |           |                       |           |
|-----------------------|-----------|-----------------------|-----------|
| N(3C)-C(3'C)          | 1.42(4)   | C(3'C)-H(3CA)         | 0.9600    |
| C(3'C)-H(3CB)         | 0.9600    | C(3'C)-H(3CC)         | 0.9600    |
| C(3"C)-H(3CD)         | 0.9600    | C(3"C)-H(3CE)         | 0.9600    |
| C(3"C)-H(3CF)         | 0.9600    | N(3'C)-C(3"F)         | 1.40(4)   |
| N(3'C)-C(3'F)         | 1.52(5)   | C(3'F)-H(3CG)         | 0.9600    |
| C(3'F)-H(3CH)         | 0.9600    | C(3'F)-H(3CI)         | 0.9600    |
| C(3"F)-H(3CJ)         | 0.9600    | C(3"F)-H(3CK)         | 0.9600    |
| C(3"F)-H(3CL)         | 0.9600    |                       |           |
|                       |           |                       |           |
| C(10)-C(9)-C(8)       | 119.2(5)  | C(10)-C(9)-H(9)       | 120.4     |
| C(8)-C(9)-H(9)        | 120.4     | C(9)-C(10)-C(11)      | 120.4(5)  |
| C(9)-C(10)-C(14)      | 117.9(5)  | C(11)-C(10)-C(14)     | 121.7(5)  |
| O(14)-C(14)-O(15)     | 123.0(5)  | O(14)-C(14)-C(10)     | 117.7(5)  |
| O(15)-C(14)-C(10)     | 119.3(5)  | C(12)-C(11)-C(10)     | 120.5(5)  |
| C(12)-C(11)-H(11)     | 119.8     | C(10)-C(11)-H(11)     | 119.8     |
| C(11)-C(12)-C(13)     | 120.0(5)  | C(11)-C(12)-H(12)     | 120.0     |
| C(13)-C(12)-H(12)     | 120.0     | C(12)-C(13)-C(8)      | 120.2(5)  |
| C(12)-C(13)-H(13)     | 119.9     | C(8)-C(13)-H(13)      | 119.9     |
| C(13)-C(8)-C(9)       | 119.8(5)  | C(13)-C(8)-N(7)       | 118.3(5)  |
| C(9)-C(8)-N(7)        | 121.8(5)  | C(5)-N(7)-C(8)        | 130.3(4)  |
| C(5)-N(7)-H(7)        | 114.9     | C(8)-N(7)-H(7)        | 114.9     |
| N(7)-C(5)-C(4)        | 125.0(4)  | N(7)-C(5)-C(6)        | 119.5(4)  |
| C(4)-C(5)-C(6)        | 115.5(5)  | C(3)-C(4)-C(5)        | 123.0(5)  |
| C(3)-C(4)-N(4)        | 118.4(5)  | C(5)-C(4)-N(4)        | 118.5(5)  |
| O(4')-N(4)-O(4)       | 120.9(5)  | O(4')-N(4)-C(4)       | 121.2(5)  |
| O(4)-N(4)-C(4)        | 117.7(5)  | C(2)-C(3)-C(4)        | 119.9(5)  |
| C(2)-C(3)-H(3)        | 120.1     | C(4)-C(3)-H(3)        | 120.1     |
| C(3)-C(2)-C(1)        | 120.5(5)  | C(3)-C(2)-N(2')       | 116.0(5)  |
| C(1)-C(2)-N(2')       | 123.5(5)  | O(2'')-N(2')-O(2')    | 121.6(6)  |
| O(2'')-N(2')-C(2)     | 120.1(6)  | O(2')-N(2')-C(2)      | 118.3(6)  |
| O(2)-C(1)-C(6)        | 123.1(4)  | O(2)-C(1)-C(2)        | 117.1(5)  |
| C(6)-C(1)-C(2)        | 119.7(4)  | C(1)-C(6)-C(5)        | 121.3(4)  |
| C(1)-C(6)-H(6)        | 119.3     | C(5)-C(6)-H(6)        | 119.3     |
| C(1)-O(2)-N(2)        | 111.2(4)  | N(1)-N(2)-O(2)        | 106.1(4)  |
| O(1)-N(1)-N(2)        | 127.0(5)  | O(1)-N(1)-N(3')       | 118.9(9)  |
| N(2)-N(1)-N(3')       | 110.3(11) | O(1)-N(1)-N(3)        | 116.2(8)  |
| N(2)-N(1)-N(3)        | 114.6(9)  | N(3')-N(1)-N(3)       | 37.4(8)   |
| C(3'')-N(3')-N(1)     | 114.1(16) | C(3'')-N(3')-C(3''')  | 126(2)    |
| N(1)-N(3')-C(3''')    | 105(3)    | N(3')-C(3'')-H(3AA)   | 109.5     |
| N(3')-C(3'')-H(3AB)   | 109.5     | H(3AA)-C(3'')-H(3AB)  | 109.5     |
| N(3')-C(3'')-H(3AC)   | 109.5     | H(3AA)-C(3'')-H(3AC)  | 109.5     |
| H(3AB)-C(3'')-H(3AC)  | 109.5     | N(3')-C(3''')-H(3AD)  | 109.4     |
| N(3')-C(3''')-H(3AE)  | 109.5     | H(3AD)-C(3''')-H(3AE) | 109.5     |
| N(3')-C(3''')-H(3AF)  | 109.5     | H(3AD)-C(3''')-H(3AF) | 109.5     |
| H(3AE)-C(3''')-H(3AF) | 109.5     | C(3')-N(3)-N(1)       | 117.1(12) |
| C(3')-N(3)-C(3'')     | 112(2)    | N(1)-N(3)-C(3'')      | 114(3)    |

Table S9. (continued)

|                      |          |                       |          |
|----------------------|----------|-----------------------|----------|
| N(3)-C(3')-H(3'A)    | 109.5    | N(3)-C(3')-H(3'B)     | 109.5    |
| H(3'A)-C(3')-H(3'B)  | 109.5    | N(3)-C(3')-H(3'C)     | 109.5    |
| H(3'A)-C(3')-H(3'C)  | 109.5    | H(3'B)-C(3')-H(3'C)   | 109.5    |
| N(3)-C(3'')-H(3'A)   | 109.5    | N(3)-C(3'')-H(3'B)    | 109.4    |
| H(3'A)-C(3'')-H(3'B) | 109.5    | N(3)-C(3'')-H(3'C)    | 109.5    |
| H(3'A)-C(3'')-H(3'C) | 109.5    | H(3'B)-C(3'')-H(3'C)  | 109.5    |
| C(10A)-C(9A)-C(8A)   | 120.0(4) | C(10A)-C(9A)-H(9A)    | 120.0    |
| C(8A)-C(9A)-H(9A)    | 120.0    | C(11A)-C(10A)-C(9A)   | 121.0(5) |
| C(11A)-C(10A)-C(14A) | 120.1(4) | C(9A)-C(10A)-C(14A)   | 118.9(4) |
| O(15A)-C(14A)-O(14A) | 123.3(5) | O(15A)-C(14A)-C(10A)  | 120.1(5) |
| O(14A)-C(14A)-C(10A) | 116.5(5) | C(10A)-C(11A)-C(12A)  | 118.7(5) |
| C(10A)-C(11A)-H(11A) | 120.7    | C(12A)-C(11A)-H(11A)  | 120.7    |
| C(13A)-C(12A)-C(11A) | 120.5(5) | C(13A)-C(12A)-H(12A)  | 119.7    |
| C(11A)-C(12A)-H(12A) | 119.7    | C(12A)-C(13A)-C(8A)   | 120.9(5) |
| C(12A)-C(13A)-H(13A) | 119.6    | C(8A)-C(13A)-H(13A)   | 119.5    |
| C(13A)-C(8A)-C(9A)   | 118.7(4) | C(13A)-C(8A)-N(7A)    | 118.9(4) |
| C(9A)-C(8A)-N(7A)    | 122.3(4) | C(5A)-N(7A)-C(8A)     | 127.1(4) |
| C(5A)-N(7A)-H(7A)    | 116.4    | C(8A)-N(7A)-H(7A)     | 116.5    |
| N(7A)-C(5A)-C(6A)    | 121.5(4) | N(7A)-C(5A)-C(4A)     | 122.7(4) |
| C(6A)-C(5A)-C(4A)    | 115.8(4) | C(3A)-C(4A)-C(5A)     | 121.3(4) |
| C(3A)-C(4A)-N(4A)    | 115.4(4) | C(5A)-C(4A)-N(4A)     | 123.2(4) |
| O(4A)-N(4A)-O(4'A)   | 121.5(4) | O(4A)-N(4A)-C(4A)     | 120.3(4) |
| O(4'A)-N(4A)-C(4A)   | 118.2(4) | C(2A)-C(3A)-C(4A)     | 121.2(4) |
| C(2A)-C(3A)-H(3A)    | 119.4    | C(4A)-C(3A)-H(3A)     | 119.4    |
| C(3A)-C(2A)-C(1A)    | 119.2(4) | C(3A)-C(2A)-N(2'A)    | 117.2(4) |
| C(1A)-C(2A)-N(2'A)   | 123.4(4) | O(2'A)-N(2'A)-O(2''A) | 119.9(5) |
| O(2'A)-N(2'A)-C(2A)  | 120.3(5) | O(2'A)-N(2'A)-C(2A)   | 119.6(4) |
| O(2A)-C(1A)-C(6A)    | 123.4(4) | O(2A)-C(1A)-C(2A)     | 117.5(4) |
| C(6A)-C(1A)-C(2A)    | 119.1(4) | C(1A)-C(6A)-C(5A)     | 123.2(4) |
| C(1A)-C(6A)-H(6A)    | 118.4    | C(5A)-C(6A)-H(6A)     | 118.4    |
| C(1A)-O(2A)-N(2A)    | 110.2(3) | N(1A)-N(2A)-O(2A)     | 106.1(4) |
| O(1A)-N(1A)-N(2A)    | 126.9(5) | O(1A)-N(1A)-N(3A)     | 119.8(4) |
| N(2A)-N(1A)-N(3A)    | 113.1(5) | N(1A)-N(3A)-C(3'A)    | 114.1(6) |
| N(1A)-N(3A)-C(3'A)   | 115.3(5) | C(3'A)-N(3A)-C(3'A)   | 118.9(7) |
| N(3A)-C(3'A)-H(3AG)  | 109.5    | N(3A)-C(3'A)-H(3AH)   | 109.5    |
| H(3AG)-C(3'A)-H(3AH) | 109.5    | N(3A)-C(3'A)-H(3AI)   | 109.5    |
| H(3AG)-C(3'A)-H(3AI) | 109.5    | H(3AH)-C(3'A)-H(3AI)  | 109.5    |
| N(3A)-C(3'A)-H(3AJ)  | 109.5    | N(3A)-C(3'A)-H(3AK)   | 109.5    |
| H(3AJ)-C(3'A)-H(3AK) | 109.5    | N(3A)-C(3'A)-H(3AL)   | 109.5    |
| H(3AJ)-C(3'A)-H(3AL) | 109.5    | H(3AK)-C(3'A)-H(3AL)  | 109.5    |
| C(8B)-C(9B)-C(10B)   | 119.1(5) | C(8B)-C(9B)-H(9B)     | 120.4    |
| C(10B)-C(9B)-H(9B)   | 120.4    | C(11B)-C(10B)-C(9B)   | 120.2(4) |
| C(11B)-C(10B)-C(14B) | 120.9(5) | C(9B)-C(10B)-C(14B)   | 118.9(5) |
| O(14B)-C(14B)-O(15B) | 124.0(5) | O(14B)-C(14B)-C(10B)  | 119.0(5) |
| O(15B)-C(14B)-C(10B) | 117.0(5) | C(12B)-C(11B)-C(10B)  | 120.2(5) |
| C(12B)-C(11B)-H(11B) | 119.9    | C(10B)-C(11B)-H(11B)  | 119.9    |

Table S9. (continued)

|                      |           |                      |          |
|----------------------|-----------|----------------------|----------|
| C(11B)-C(12B)-C(13B) | 119.8(5)  | C(11B)-C(12B)-H(12B) | 120.1    |
| C(13B)-C(12B)-H(12B) | 120.1     | C(8B)-C(13B)-C(12B)  | 121.0(5) |
| C(8B)-C(13B)-H(13B)  | 119.5     | C(12B)-C(13B)-H(13B) | 119.5    |
| C(13B)-C(8B)-C(9B)   | 119.7(5)  | C(13B)-C(8B)-N(7B)   | 116.9(4) |
| C(9B)-C(8B)-N(7B)    | 123.3(5)  | C(5B)-N(7B)-C(8B)    | 129.4(4) |
| C(5B)-N(7B)-H(7B)    | 115.3     | C(8B)-N(7B)-H(7B)    | 115.3    |
| N(7B)-C(5B)-C(6B)    | 121.3(4)  | N(7B)-C(5B)-C(4B)    | 122.9(5) |
| C(6B)-C(5B)-C(4B)    | 115.8(4)  | C(3B)-C(4B)-C(5B)    | 121.9(5) |
| C(3B)-C(4B)-N(4B)    | 116.7(5)  | C(5B)-C(4B)-N(4B)    | 121.4(5) |
| O(4B)-N(4B)-O(4'B)   | 122.1(5)  | O(4B)-N(4B)-C(4B)    | 117.7(6) |
| O(4'B)-N(4B)-C(4B)   | 120.2(5)  | C(4B)-C(3B)-C(2B)    | 121.4(5) |
| C(4B)-C(3B)-H(3B)    | 119.3     | C(2B)-C(3B)-H(3B)    | 119.3    |
| C(3B)-C(2B)-C(1B)    | 118.2(4)  | C(3B)-C(2B)-N(2'B)   | 117.3(5) |
| C(1B)-C(2B)-N(2'B)   | 124.4(5)  | O(2'B)-N(2'B)-O(2'B) | 123.2(5) |
| O(2'B)-N(2'B)-C(2B)  | 118.4(5)  | O(2'B)-N(2'B)-C(2B)  | 118.4(5) |
| C(6B)-C(1B)-O(2B)    | 122.5(4)  | C(6B)-C(1B)-C(2B)    | 120.8(5) |
| O(2B)-C(1B)-C(2B)    | 116.6(4)  | C(1B)-C(6B)-C(5B)    | 121.8(5) |
| C(1B)-C(6B)-H(6B)    | 119.1     | C(5B)-C(6B)-H(6B)    | 119.1    |
| C(1B)-O(2B)-N(2B)    | 110.0(4)  | N(1B)-N(2B)-O(2B)    | 106.0(4) |
| O(1B)-N(1B)-N(3'B)   | 116.9(18) | O(1B)-N(1B)-N(2B)    | 125.7(5) |
| N(3'B)-N(1B)-N(2B)   | 112.1(19) | O(1B)-N(1B)-N(3B)    | 119.3(8) |
| N(3'B)-N(1B)-N(3B)   | 35(3)     | N(2B)-N(1B)-N(3B)    | 114.0(7) |
| N(1B)-N(3B)-C(3'B)   | 113.8(13) | N(1B)-N(3B)-C(3'B)   | 107(2)   |
| C(3'B)-N(3B)-C(3'B)  | 116.0(17) | N(3B)-C(3'B)-H(3BA)  | 109.6    |
| N(3B)-C(3'B)-H(3BB)  | 109.7     | H(3BA)-C(3'B)-H(3BB) | 109.5    |
| N(3B)-C(3'B)-H(3BC)  | 109.2     | H(3BA)-C(3'B)-H(3BC) | 109.5    |
| H(3BB)-C(3'B)-H(3BC) | 109.5     | N(3B)-C(3'B)-H(3BD)  | 109.5    |
| N(3B)-C(3'B)-H(3BE)  | 109.5     | H(3BD)-C(3'B)-H(3BE) | 109.5    |
| N(3B)-C(3'B)-H(3BF)  | 109.4     | (3BD)-C(3'B)-H(3BF)  | 109.5    |
| H(3BE)-C(3'B)-H(3BF) | 109.5     | N(1B)-N(3'B)-C(3'E)  | 115(5)   |
| N(1B)-N(3'B)-C(3'E)  | 112(4)    | C(3'E)-N(3'B)-C(3'E) | 107(4)   |
| N(3'B)-C(3'E)-H(3BG) | 109.2     | N(3'B)-C(3'E)-H(3BH) | 109.5    |
| H(3BG)-C(3'E)-H(3BH) | 109.5     | N(3'B)-C(3'E)-H(3BI) | 109.8    |
| H(3BG)-C(3'E)-H(3BI) | 109.5     | H(3BH)-C(3'E)-H(3BI) | 109.5    |
| N(3'B)-C(3'E)-H(3BJ) | 109.4     | N(3'B)-C(3'E)-H(3BK) | 109.7    |
| H(3BJ)-C(3'E)-H(3BK) | 109.5     | N(3'B)-C(3'E)-H(3BL) | 109.2    |
| H(3BJ)-C(3'E)-H(3BL) | 109.5     | H(3BK)-C(3'E)-H(3BL) | 109.5    |
| C(8C)-C(9C)-C(10C)   | 119.8(5)  | C(8C)-C(9C)-H(9C)    | 120.1    |
| C(10C)-C(9C)-H(9C)   | 120.1     | C(11C)-C(10C)-C(9C)  | 120.0(5) |
| C(11C)-C(10C)-C(14C) | 120.2(5)  | C(9C)-C(10C)-C(14C)  | 119.8(4) |
| O(15C)-C(14C)-O(14C) | 122.6(5)  | O(15C)-C(14C)-C(10C) | 118.8(5) |
| O(14C)-C(14C)-C(10C) | 118.6(5)  | C(12C)-C(11C)-C(10C) | 119.7(5) |
| C(12C)-C(11C)-H(11C) | 120.1     | C(10C)-C(11C)-H(11C) | 120.1    |
| C(13C)-C(12C)-C(11C) | 120.1(5)  | C(13C)-C(12C)-H(12C) | 119.9    |
| C(11C)-C(12C)-H(12C) | 119.9     | C(12C)-C(13C)-C(8C)  | 120.8(5) |
| C(12C)-C(13C)-H(13C) | 119.6     | C(8C)-C(13C)-H(13C)  | 119.6    |

Table S9. (continued)

|                       |           |                        |           |
|-----------------------|-----------|------------------------|-----------|
| C(9C)-C(8C)-C(13C)    | 119.5(5)  | C(9C)-C(8C)-N(7C)      | 124.3(4)  |
| C(13C)-C(8C)-N(7C)    | 115.9(4)  | C(5C)-N(7C)-C(8C)      | 129.8(4)  |
| C(5C)-N(7C)-H(7C)     | 115.1     | C(8C)-N(7C)-H(7C)      | 115.1     |
| N(7C)-C(5C)-C(6C)     | 121.9(4)  | N(7C)-C(5C)-C(4C)      | 121.5(5)  |
| C(6C)-C(5C)-C(4C)     | 116.5(4)  | C(3C)-C(4C)-C(5C)      | 120.5(5)  |
| C(3C)-C(4C)-N(4C)     | 116.6(5)  | C(5C)-C(4C)-N(4C)      | 122.9(5)  |
| O(4C)-N(4C)-O(4'C)    | 121.0(5)  | O(4C)-N(4C)-C(4C)      | 118.7(6)  |
| O(4'C)-N(4C)-C(4C)    | 120.3(5)  | C(2C)-C(3C)-C(4C)      | 121.8(5)  |
| C(2C)-C(3C)-H(3C)     | 119.1     | C(4C)-C(3C)-H(3C)      | 119.1     |
| C(3C)-C(2C)-C(1C)     | 119.3(5)  | C(3C)-C(2C)-N(2'C)     | 118.0(5)  |
| C(1C)-C(2C)-N(2'C)    | 122.7(5)  | O(2'C)-N(2'C)-O(2''C)  | 123.5(5)  |
| O(2'C)-N(2'C)-C(2C)   | 120.1(5)  | O(2''C)-N(2'C)-C(2C)   | 116.2(5)  |
| O(2C)-C(1C)-C(6C)     | 123.8(5)  | O(2C)-C(1C)-C(2C)      | 117.6(4)  |
| C(6C)-C(1C)-C(2C)     | 118.5(5)  | C(1C)-C(6C)-C(5C)      | 123.1(5)  |
| C(1C)-C(6C)-H(6C)     | 118.4     | C(5C)-C(6C)-H(6C)      | 118.4     |
| C(1C)-O(2C)-N(2C)     | 110.4(4)  | N(1C)-N(2C)-O(2C)      | 106.1(4)  |
| O(1C)-N(1C)-N(2C)     | 126.3(5)  | O(1C)-N(1C)-N(3C)      | 118.6(11) |
| N(2C)-N(1C)-N(3C)     | 113.3(10) | O(1C)-N(1C)-N(3'C)     | 115.6(14) |
| N(2C)-N(1C)-N(3'C)    | 116.0(11) | N(3C)-N(1C)-N(3'C)     | 29.5(12)  |
| C(3''C)-N(3C)-N(1C)   | 115(2)    | C(3''C)-N(3C)-C(3'C)   | 127(3)    |
| N(1C)-N(3C)-C(3'C)    | 112(2)    | N(3C)-C(3'C)-H(3CA)    | 109.5     |
| N(3C)-C(3'C)-H(3CB)   | 109.5     | H(3CA)-C(3'C)-H(3CB)   | 109.5     |
| N(3C)-C(3'C)-H(3CC)   | 109.4     | H(3CA)-C(3'C)-H(3CC)   | 109.5     |
| H(3CB)-C(3'C)-H(3CC)  | 109.5     | N(3C)-C(3''C)-H(3CD)   | 109.5     |
| N(3C)-C(3''C)-H(3CE)  | 109.4     | H(3CD)-C(3''C)-H(3CE)  | 109.5     |
| N(3C)-C(3''C)-H(3CF)  | 109.5     | H(3CD)-C(3''C)-H(3CF)  | 109.5     |
| H(3CE)-C(3''C)-H(3CF) | 109.5     | N(1C)-N(3'C)-C(3''F)   | 117(2)    |
| N(1C)-N(3'C)-C(3''F)  | 115(3)    | C(3''F)-N(3'C)-C(3''F) | 114(3)    |
| N(3'C)-C(3''F)-H(3CG) | 109.5     | N(3'C)-C(3''F)-H(3CH)  | 109.5     |
| H(3CG)-C(3''F)-H(3CH) | 109.5     | N(3'C)-C(3''F)-H(3CI)  | 109.5     |
| H(3CG)-C(3''F)-H(3CI) | 109.5     | H(3CH)-C(3''F)-H(3CI)  | 109.5     |
| N(3'C)-C(3''F)-H(3CJ) | 109.4     | N(3'C)-C(3''F)-H(3CK)  | 109.5     |
| H(3CJ)-C(3''F)-H(3CK) | 109.5     | N(3'C)-C(3''F)-H(3CL)  | 109.5     |
| H(3CJ)-C(3''F)-H(3CL) | 109.5     | H(3CK)-C(3''F)-H(3CL)  | 109.5     |

**Table S10.** Anisotropic displacement parameters ( $\text{\AA}^2 \times 10^3$ ) for **6c**. The anisotropic displacement factor exponent takes the form:  $-2\pi^2 [h^2 a^{*2} U^{11} + \dots + 2 h k a^* b^* U^{12}]$

|         | $U^{11}$ | $U^{22}$ | $U^{33}$ | $U^{23}$ | $U^{13}$ | $U^{12}$ |
|---------|----------|----------|----------|----------|----------|----------|
| C(9)    | 97(4)    | 65(3)    | 75(3)    | 3(2)     | -23(3)   | 9(3)     |
| C(10)   | 89(4)    | 62(3)    | 74(3)    | 0(2)     | -18(3)   | 5(3)     |
| O(15)   | 106(3)   | 73(3)    | 127(3)   | -3(2)    | -32(3)   | 1(2)     |
| C(14)   | 89(4)    | 68(3)    | 89(4)    | 0(3)     | -17(3)   | 6(3)     |
| O(14)   | 124(4)   | 75(3)    | 147(4)   | 11(2)    | -59(3)   | 7(2)     |
| C(11)   | 102(4)   | 67(3)    | 78(3)    | -6(2)    | -20(3)   | 13(3)    |
| C(12)   | 90(4)    | 72(3)    | 85(3)    | 1(3)     | -20(3)   | 13(3)    |
| C(13)   | 102(4)   | 78(4)    | 73(3)    | 5(3)     | -27(3)   | 8(3)     |
| C(8)    | 119(5)   | 72(3)    | 63(3)    | -1(2)    | -27(3)   | -3(3)    |
| N(7)    | 169(5)   | 73(3)    | 81(3)    | 1(2)     | -59(3)   | -3(3)    |
| C(5)    | 112(5)   | 77(4)    | 74(3)    | -4(3)    | -36(3)   | 2(3)     |
| C(4)    | 196(8)   | 82(4)    | 84(4)    | -2(3)    | -69(5)   | -22(4)   |
| O(4')   | 1680(60) | 129(7)   | 298(12)  | 67(8)    | -630(30) | -148(17) |
| O(4)    | 267(8)   | 154(5)   | 94(3)    | -12(3)   | -61(4)   | -79(5)   |
| N(4)    | 462(16)  | 103(5)   | 147(6)   | -36(5)   | -194(9)  | 3(7)     |
| C(3)    | 123(5)   | 83(4)    | 89(4)    | -20(3)   | -33(4)   | -10(4)   |
| C(2)    | 86(4)    | 57(3)    | 91(4)    | -10(2)   | -24(3)   | -1(3)    |
| O(2'')  | 279(8)   | 70(3)    | 135(4)   | -30(3)   | -32(5)   | -13(4)   |
| N(2')   | 125(5)   | 78(4)    | 114(4)   | -1(3)    | -37(4)   | -9(3)    |
| C(1)    | 77(3)    | 69(3)    | 71(3)    | -12(2)   | -19(3)   | 8(3)     |
| O(2')   | 294(9)   | 90(4)    | 147(5)   | 22(3)    | -81(6)   | -27(4)   |
| C(6)    | 76(3)    | 64(3)    | 71(3)    | -10(2)   | -20(2)   | 6(2)     |
| O(2)    | 117(3)   | 70(2)    | 71(2)    | 1(2)     | -25(2)   | -8(2)    |
| N(2)    | 145(4)   | 68(3)    | 61(2)    | -8(2)    | -20(3)   | -5(3)    |
| N(1)    | 133(5)   | 87(3)    | 72(3)    | -2(3)    | -21(3)   | -3(3)    |
| O(1)    | 185(5)   | 109(4)   | 89(3)    | 25(3)    | -36(3)   | -20(3)   |
| N(3')   | 150(20)  | 130(14)  | 66(7)    | -17(7)   | -9(10)   | -12(15)  |
| C(3'')  | 290(50)  | 109(17)  | 149(19)  | -63(16)  | -50(30)  | -30(30)  |
| C(3''') | 100(13)  | 134(16)  | 62(12)   | -27(12)  | -26(11)  | -4(13)   |
| N(3)    | 130(20)  | 106(10)  | 70(7)    | -29(6)   | -29(9)   | -4(10)   |
| C(3')   | 190(30)  | 85(12)   | 102(11)  | 1(9)     | -58(15)  | -44(14)  |
| C(3'')  | 190(30)  | 220(40)  | 79(13)   | -65(18)  | 5(13)    | 50(20)   |
| C(9A)   | 86(4)    | 51(3)    | 70(3)    | -8(2)    | -15(2)   | -2(2)    |
| C(10A)  | 82(4)    | 59(3)    | 68(3)    | -4(2)    | -9(2)    | 6(2)     |
| O(14A)  | 108(3)   | 73(3)    | 143(4)   | -4(2)    | -50(3)   | 4(2)     |
| C(14A)  | 84(4)    | 57(3)    | 90(4)    | -5(2)    | -16(3)   | 6(3)     |
| O(15A)  | 113(3)   | 65(2)    | 127(3)   | 6(2)     | -32(3)   | 16(2)    |
| C(11A)  | 106(4)   | 47(3)    | 76(3)    | 0(2)     | -13(3)   | -3(3)    |
| C(12A)  | 126(5)   | 60(3)    | 75(3)    | -2(2)    | -25(3)   | -14(3)   |
| C(13A)  | 100(4)   | 65(3)    | 65(3)    | -1(2)    | -20(3)   | -9(3)    |
| C(8A)   | 107(4)   | 49(3)    | 60(3)    | -4(2)    | -21(3)   | -3(3)    |
| N(7A)   | 115(4)   | 52(2)    | 65(2)    | -8(2)    | -32(2)   | 6(2)     |
| C(5A)   | 80(3)    | 53(3)    | 62(3)    | -5(2)    | -18(2)   | 3(2)     |

Table S10. (continued)

|        | U <sup>11</sup> | U <sup>22</sup> | U <sup>33</sup> | U <sup>23</sup> | U <sup>13</sup> | U <sup>12</sup> |
|--------|-----------------|-----------------|-----------------|-----------------|-----------------|-----------------|
| C(4A)  | 82(3)           | 54(3)           | 62(3)           | -3(2)           | -25(2)          | 2(2)            |
| N(4A)  | 109(4)          | 63(3)           | 70(3)           | -2(2)           | -35(2)          | 0(2)            |
| O(4'A) | 242(6)          | 72(3)           | 80(3)           | 0(2)            | -73(3)          | -30(3)          |
| O(4A)  | 156(4)          | 82(3)           | 75(2)           | 21(2)           | -46(2)          | -28(3)          |
| C(3A)  | 78(3)           | 51(3)           | 73(3)           | 0(2)            | -24(2)          | 5(2)            |
| C(2A)  | 82(3)           | 50(3)           | 67(3)           | -9(2)           | -20(2)          | 2(2)            |
| N(2'A) | 125(4)          | 59(3)           | 79(3)           | -15(2)          | -28(3)          | 8(3)            |
| O(2"A) | 227(6)          | 53(2)           | 122(4)          | 0(2)            | -55(4)          | -3(3)           |
| C(1A)  | 70(3)           | 67(3)           | 59(3)           | -7(2)           | -16(2)          | 7(2)            |
| O(2'A) | 368(10)         | 83(3)           | 126(4)          | -18(3)          | -125(6)         | -17(5)          |
| C(6A)  | 82(3)           | 54(3)           | 60(3)           | -4(2)           | -15(2)          | 6(2)            |
| O(2A)  | 104(3)          | 66(2)           | 59(2)           | -7(2)           | -19(2)          | 9(2)            |
| N(2A)  | 115(4)          | 70(3)           | 59(2)           | 4(2)            | -17(2)          | 7(2)            |
| N(1A)  | 106(4)          | 87(3)           | 66(3)           | -3(2)           | -25(2)          | 5(3)            |
| O(1A)  | 201(6)          | 115(4)          | 92(3)           | -10(3)          | -65(3)          | -21(4)          |
| N(3A)  | 194(7)          | 108(4)          | 83(3)           | 23(3)           | -50(4)          | 1(4)            |
| C(3"A) | 245(12)         | 213(11)         | 156(8)          | 95(8)           | -131(8)         | -69(9)          |
| C(3'A) | 230(10)         | 91(5)           | 123(6)          | 26(5)           | -26(6)          | 27(6)           |
| C(9B)  | 94(4)           | 51(3)           | 69(3)           | -3(2)           | -11(3)          | 6(2)            |
| C(10B) | 97(4)           | 52(3)           | 73(3)           | -13(2)          | -10(3)          | 13(3)           |
| O(14B) | 181(5)          | 69(2)           | 76(2)           | -1(2)           | -28(3)          | 0(3)            |
| C(14B) | 104(4)          | 63(3)           | 78(3)           | -10(3)          | -16(3)          | 9(3)            |
| O(15B) | 165(4)          | 68(2)           | 85(2)           | -18(2)          | -24(3)          | -6(2)           |
| C(11B) | 122(5)          | 54(3)           | 86(4)           | -5(2)           | -13(3)          | -2(3)           |
| C(12B) | 149(6)          | 55(3)           | 87(4)           | 1(3)            | -25(4)          | 0(3)            |
| C(13B) | 126(5)          | 60(3)           | 77(3)           | -1(2)           | -22(3)          | 8(3)            |
| C(8B)  | 97(4)           | 54(3)           | 78(3)           | -4(2)           | -20(3)          | 8(3)            |
| N(7B)  | 116(4)          | 54(2)           | 85(3)           | -7(2)           | -38(3)          | 8(2)            |
| C(5B)  | 102(4)          | 55(3)           | 71(3)           | -1(2)           | -20(3)          | -1(3)           |
| C(4B)  | 101(4)          | 60(3)           | 71(3)           | -10(2)          | -24(3)          | -2(3)           |
| O(4'B) | 151(4)          | 91(3)           | 142(4)          | 2(3)            | -79(3)          | 8(3)            |
| O(4B)  | 160(5)          | 109(4)          | 165(5)          | -22(3)          | -82(4)          | -20(3)          |
| N(4B)  | 114(4)          | 90(4)           | 102(4)          | -7(3)           | -48(3)          | -9(3)           |
| C(3B)  | 106(4)          | 61(3)           | 75(3)           | -8(2)           | -18(3)          | -15(3)          |
| C(2B)  | 114(4)          | 48(3)           | 70(3)           | -8(2)           | -12(3)          | -1(3)           |
| N(2'B) | 139(5)          | 54(3)           | 92(3)           | -10(2)          | -14(3)          | -2(3)           |
| O(2"B) | 204(6)          | 62(3)           | 155(4)          | -32(3)          | -68(4)          | -10(3)          |
| C(1B)  | 89(4)           | 55(3)           | 69(3)           | -9(2)           | -17(3)          | 5(2)            |
| O(2'B) | 135(4)          | 61(2)           | 106(3)          | 2(2)            | -18(3)          | 6(2)            |
| C(6B)  | 88(4)           | 52(3)           | 69(3)           | -8(2)           | -15(3)          | -3(2)           |
| O(2B)  | 111(3)          | 57(2)           | 97(3)           | -16(2)          | -32(2)          | 7(2)            |
| N(2B)  | 113(4)          | 64(3)           | 96(3)           | -25(2)          | -38(3)          | 16(3)           |
| O(1B)  | 159(5)          | 72(3)           | 171(5)          | -30(3)          | -80(4)          | 38(3)           |
| N(1B)  | 108(4)          | 66(3)           | 104(3)          | -22(2)          | -39(3)          | 16(3)           |

Table S10. (continued)

|         | $U^{11}$ | $U^{22}$ | $U^{33}$ | $U^{23}$ | $U^{13}$ | $U^{12}$ |
|---------|----------|----------|----------|----------|----------|----------|
| N(3B)   | 113(10)  | 73(8)    | 116(9)   | -22(6)   | -38(7)   | -3(6)    |
| C(3'B)  | 230(30)  | 98(15)   | 250(30)  | -86(16)  | -150(20) | 22(15)   |
| C(3''B) | 83(11)   | 94(8)    | 113(10)  | -32(8)   | -28(8)   | 12(8)    |
| N(3'B)  | 120(30)  | 72(19)   | 140(40)  | -28(19)  | -80(30)  | 3(17)    |
| C(3'E)  | 87(18)   | 25(11)   | 100(20)  | -20(12)  | -21(17)  | 13(11)   |
| C(3''E) | 100(30)  | 170(40)  | 120(30)  | 60(30)   | -60(20)  | -60(30)  |
| C(9C)   | 92(4)    | 53(3)    | 74(3)    | -2(2)    | -6(3)    | 3(2)     |
| C(10C)  | 91(4)    | 59(3)    | 76(3)    | -3(2)    | -10(3)   | 3(3)     |
| O(14C)  | 182(5)   | 69(2)    | 80(2)    | 0(2)     | -30(3)   | -3(3)    |
| C(14C)  | 101(4)   | 61(3)    | 75(3)    | -1(3)    | -5(3)    | 7(3)     |
| O(15C)  | 188(5)   | 68(2)    | 89(3)    | 11(2)    | -30(3)   | 8(3)     |
| C(11C)  | 93(4)    | 60(3)    | 88(4)    | -2(3)    | -8(3)    | 7(3)     |
| C(12C)  | 101(4)   | 56(3)    | 100(4)   | -14(3)   | -15(3)   | 2(3)     |
| C(13C)  | 93(4)    | 62(3)    | 77(3)    | -10(2)   | -8(3)    | 4(3)     |
| C(8C)   | 79(4)    | 58(3)    | 77(3)    | -10(2)   | -10(3)   | 6(2)     |
| N(7C)   | 106(4)   | 59(2)    | 79(3)    | -2(2)    | -23(2)   | -1(2)    |
| C(5C)   | 99(4)    | 51(3)    | 68(3)    | -5(2)    | -11(3)   | 7(3)     |
| C(4C)   | 91(4)    | 66(3)    | 76(3)    | -3(2)    | -12(3)   | 19(3)    |
| N(4C)   | 112(4)   | 85(4)    | 107(4)   | 8(3)     | -33(3)   | 7(3)     |
| O(4'C)  | 139(4)   | 98(3)    | 136(4)   | 10(3)    | -62(3)   | -13(3)   |
| O(4C)   | 158(5)   | 107(4)   | 190(5)   | 27(4)    | -94(4)   | 17(3)    |
| C(3C)   | 97(4)    | 60(3)    | 85(4)    | 5(3)     | -8(3)    | 14(3)    |
| C(2C)   | 115(5)   | 48(3)    | 75(3)    | 0(2)     | -5(3)    | 7(3)     |
| O(2''C) | 191(5)   | 58(2)    | 125(4)   | 14(2)    | -36(3)   | 18(3)    |
| N(2'C)  | 128(4)   | 55(3)    | 85(3)    | 3(2)     | 1(3)     | 10(3)    |
| C(1C)   | 95(4)    | 56(3)    | 66(3)    | -2(2)    | -7(3)    | 2(3)     |
| O(2'C)  | 134(4)   | 65(2)    | 102(3)   | -9(2)    | -3(3)    | 0(2)     |
| C(6C)   | 95(4)    | 53(3)    | 68(3)    | -2(2)    | -11(3)   | 8(3)     |
| O(2C)   | 114(3)   | 57(2)    | 92(2)    | 2(2)     | -23(2)   | 0(2)     |
| N(2C)   | 129(4)   | 72(3)    | 92(3)    | 10(2)    | -35(3)   | -16(3)   |
| O(1C)   | 157(5)   | 80(3)    | 236(7)   | 23(4)    | -85(5)   | -30(3)   |
| N(1C)   | 126(5)   | 73(3)    | 105(4)   | 5(3)     | -29(3)   | -9(3)    |
| N(3C)   | 93(15)   | 131(15)  | 114(18)  | -6(14)   | -39(14)  | -30(10)  |
| C(3'C)  | 140(20)  | 130(20)  | 250(40)  | 120(30)  | -100(20) | -25(17)  |
| C(3''C) | 160(30)  | 120(19)  | 116(18)  | 44(14)   | -11(18)  | 12(19)   |
| N(3'C)  | 140(18)  | 70(9)    | 84(13)   | 4(7)     | -26(11)  | 20(10)   |
| C(3'F)  | 160(30)  | 68(13)   | 170(20)  | 1(16)    | -80(18)  | -27(15)  |
| C(3''F) | 62(12)   | 130(20)  | 220(30)  | -28(18)  | -63(16)  | 1(10)    |



**Table S11.** Hydrogen coordinates ( $\times 10^4$ ) and isotropic displacement parameters ( $\text{\AA}^2 \times 10^3$ ) for **6c**.

|        | x     | y     | z    | U(eq) |
|--------|-------|-------|------|-------|
| H(9)   | -2797 | -976  | 3417 | 95    |
| H(11)  | -2394 | -4083 | 3317 | 99    |
| H(12)  | -770  | -4073 | 3842 | 99    |
| H(13)  | -83   | -2510 | 4129 | 101   |
| H(7)   | -676  | -706  | 4323 | 128   |
| H(3)   | -404  | 2749  | 4011 | 117   |
| H(6)   | -1336 | -116  | 3040 | 85    |
| H(3AA) | -1724 | -828  | 2067 | 270   |
| H(3AB) | -1730 | -1442 | 1531 | 270   |
| H(3AC) | -2931 | -999  | 1791 | 270   |
| H(3AD) | -2435 | 1057  | 862  | 147   |
| H(3AE) | -3486 | 364   | 1048 | 147   |
| H(3AF) | -2444 | -105  | 683  | 147   |
| H(3'A) | -3048 | -614  | 2142 | 184   |
| H(3'B) | -2331 | -1210 | 1686 | 184   |
| H(3'C) | -3707 | -988  | 1643 | 184   |
| H(3"A) | -2997 | -385  | 755  | 248   |
| H(3"B) | -1661 | -163  | 852  | 248   |
| H(3"C) | -2569 | 757   | 723  | 248   |
| H(9A)  | 2672  | -747  | 1568 | 82    |
| H(11A) | 2229  | -3817 | 1666 | 91    |
| H(12A) | 575   | -3611 | 1135 | 103   |
| H(13A) | -66   | -1991 | 858  | 91    |
| H(7A)  | 555   | -234  | 657  | 92    |
| H(3A)  | 833   | 3220  | 937  | 81    |
| H(6A)  | 1218  | 222   | 1942 | 78    |
| H(3AG) | 2735  | 631   | 4176 | 301   |
| H(3AH) | 3750  | 320   | 3758 | 301   |
| H(3AI) | 3072  | -545  | 4071 | 301   |
| H(3AJ) | 1263  | -783  | 3046 | 223   |
| H(3AK) | 1977  | -1400 | 3482 | 223   |
| H(3AL) | 2650  | -953  | 2980 | 223   |
| H(9B)  | 6536  | 3531  | 3834 | 86    |
| H(11B) | 5767  | 519   | 3974 | 104   |
| H(12B) | 6277  | 533   | 4852 | 116   |
| H(13B) | 6977  | 2020  | 5212 | 105   |
| H(7B)  | 7960  | 3612  | 4990 | 101   |
| H(3B)  | 7770  | 7069  | 5180 | 96    |
| H(6B)  | 5566  | 4672  | 4334 | 83    |
| H(3BA) | 2857  | 3927  | 3191 | 281   |
| H(3BB) | 3768  | 4190  | 3624 | 281   |
| H(3BC) | 3859  | 4707  | 3058 | 281   |
| H(3BD) | 1128  | 6259  | 3301 | 144   |

**Table S11.** (continued)

|        | x    | y    | z    | U(eq) |
|--------|------|------|------|-------|
| H(3BE) | 1228 | 5206 | 2992 | 144   |
| H(3BF) | 2096 | 6091 | 2843 | 144   |
| H(3BG) | 3729 | 4058 | 3581 | 107   |
| H(3BH) | 3082 | 3945 | 3042 | 107   |
| H(3BI) | 2334 | 4060 | 3577 | 107   |
| H(3BJ) | 1785 | 6637 | 3135 | 193   |
| H(3BK) | 1306 | 5577 | 3343 | 193   |
| H(3BL) | 1854 | 5664 | 2764 | 193   |
| H(9C)  | 3873 | 3627 | 1223 | 87    |
| H(11C) | 4477 | 527  | 1144 | 96    |
| H(12C) | 3895 | 563  | 272  | 103   |
| H(13C) | 3303 | 2108 | -121 | 93    |
| H(7C)  | 2439 | 3785 | 37   | 98    |
| H(3C)  | 2416 | 7250 | -125 | 98    |
| H(6C)  | 4675 | 4746 | 750  | 86    |
| H(3CA) | 6193 | 4458 | 1569 | 259   |
| H(3CB) | 6711 | 4234 | 2132 | 259   |
| H(3CC) | 7505 | 4011 | 1619 | 259   |
| H(3CD) | 8472 | 6449 | 1836 | 200   |
| H(3CE) | 8916 | 5282 | 1887 | 200   |
| H(3CF) | 8200 | 5823 | 2361 | 200   |
| H(3CG) | 7758 | 3892 | 1914 | 197   |
| H(3CH) | 6909 | 3980 | 1431 | 197   |
| H(3CI) | 6501 | 4461 | 1981 | 197   |
| H(3CJ) | 8782 | 6374 | 1817 | 204   |
| H(3CK) | 9238 | 5222 | 1916 | 204   |
| H(3CL) | 8210 | 5719 | 2280 | 204   |

**Table S12.** Torsion angles [°] for **6c**.

|                         |           |
|-------------------------|-----------|
| C(8)-C(9)-C(10)-C(11)   | 1.0(9)    |
| C(8)-C(9)-C(10)-C(14)   | -177.6(5) |
| C(9)-C(10)-C(14)-O(14)  | 3.4(9)    |
| C(11)-C(10)-C(14)-O(14) | -175.2(6) |
| C(9)-C(10)-C(14)-O(15)  | -175.8(6) |
| C(11)-C(10)-C(14)-O(15) | 5.6(9)    |
| C(9)-C(10)-C(11)-C(12)  | 0.3(9)    |
| C(14)-C(10)-C(11)-C(12) | 178.8(6)  |
| C(10)-C(11)-C(12)-C(13) | -1.7(9)   |
| C(11)-C(12)-C(13)-C(8)  | 1.8(9)    |
| C(12)-C(13)-C(8)-C(9)   | -0.5(9)   |
| C(12)-C(13)-C(8)-N(7)   | 177.5(6)  |
| C(10)-C(9)-C(8)-C(13)   | -0.9(9)   |
| C(10)-C(9)-C(8)-N(7)    | -178.8(6) |
| C(13)-C(8)-N(7)-C(5)    | 144.5(7)  |
| C(9)-C(8)-N(7)-C(5)     | -37.6(11) |
| C(8)-N(7)-C(5)-C(4)     | 170.5(7)  |
| C(8)-N(7)-C(5)-C(6)     | -11.3(11) |
| N(7)-C(5)-C(4)-C(3)     | 178.6(7)  |
| C(6)-C(5)-C(4)-C(3)     | 0.4(11)   |
| N(7)-C(5)-C(4)-N(4)     | -4.7(12)  |
| C(6)-C(5)-C(4)-N(4)     | 177.1(6)  |
| C(3)-C(4)-N(4)-O(4')    | 168.0(9)  |
| C(5)-C(4)-N(4)-O(4')    | -8.9(11)  |
| C(3)-C(4)-N(4)-O(4)     | -7.7(10)  |
| C(5)-C(4)-N(4)-O(4)     | 175.4(6)  |
| C(5)-C(4)-C(3)-C(2)     | 2.3(12)   |
| N(4)-C(4)-C(3)-C(2)     | -174.5(6) |
| C(4)-C(3)-C(2)-C(1)     | -3.3(10)  |
| C(4)-C(3)-C(2)-N(2')    | 175.9(7)  |
| C(3)-C(2)-N(2')-O(2'')  | -14.5(10) |
| C(1)-C(2)-N(2')-O(2'')  | 164.7(7)  |
| C(3)-C(2)-N(2')-O(2')   | 163.5(7)  |
| C(1)-C(2)-N(2')-O(2')   | -17.3(10) |
| C(3)-C(2)-C(1)-O(2)     | -179.7(6) |
| N(2')-C(2)-C(1)-O(2)    | 1.0(9)    |
| C(3)-C(2)-C(1)-C(6)     | 1.7(9)    |
| N(2')-C(2)-C(1)-C(6)    | -177.5(5) |
| O(2)-C(1)-C(6)-C(5)     | -177.4(5) |
| C(2)-C(1)-C(6)-C(5)     | 1.0(8)    |
| N(7)-C(5)-C(6)-C(1)     | 179.7(6)  |
| C(4)-C(5)-C(6)-C(1)     | -2.0(9)   |
| C(6)-C(1)-O(2)-N(2)     | 3.9(7)    |
| C(2)-C(1)-O(2)-N(2)     | -174.6(5) |
| C(1)-O(2)-N(2)-N(1)     | 179.9(5)  |
| O(2)-N(2)-N(1)-O(1)     | 2.8(9)    |

**Table S12.** (continued)

---

|                             |            |
|-----------------------------|------------|
| O(2)-N(2)-N(1)-N(3')        | 160(2)     |
| O(2)-N(2)-N(1)-N(3)         | -159.4(17) |
| O(1)-N(1)-N(3')-C(3'')      | 179(2)     |
| N(2)-N(1)-N(3')-C(3'')      | 20(2)      |
| N(3)-N(1)-N(3')-C(3'')      | -85(3)     |
| O(1)-N(1)-N(3')-C(3''')     | -39(4)     |
| N(2)-N(1)-N(3')-C(3''')     | 161(2)     |
| N(3)-N(1)-N(3')-C(3''')     | 57(4)      |
| O(1)-N(1)-N(3)-C(3')        | -175.7(15) |
| N(2)-N(1)-N(3)-C(3')        | -11(2)     |
| N(3')-N(1)-N(3)-C(3')       | 80(2)      |
| O(1)-N(1)-N(3)-C(3'')       | 50(4)      |
| N(2)-N(1)-N(3)-C(3'')       | -146(3)    |
| N(3')-N(1)-N(3)-C(3'')      | -54(4)     |
| C(8A)-C(9A)-C(10A)-C(11A)   | 1.0(8)     |
| C(8A)-C(9A)-C(10A)-C(14A)   | -178.2(5)  |
| C(11A)-C(10A)-C(14A)-O(15A) | 3.7(8)     |
| C(9A)-C(10A)-C(14A)-O(15A)  | -177.1(5)  |
| C(11A)-C(10A)-C(14A)-O(14A) | -174.1(5)  |
| C(9A)-C(10A)-C(14A)-O(14A)  | 5.1(8)     |
| C(9A)-C(10A)-C(11A)-C(12A)  | 0.0(8)     |
| C(14A)-C(10A)-C(11A)-C(12A) | 179.2(5)   |
| C(10A)-C(11A)-C(12A)-C(13A) | -1.4(9)    |
| C(11A)-C(12A)-C(13A)-C(8A)  | 1.9(9)     |
| C(12A)-C(13A)-C(8A)-C(9A)   | -0.9(8)    |
| C(12A)-C(13A)-C(8A)-N(7A)   | 175.8(5)   |
| C(10A)-C(9A)-C(8A)-C(13A)   | -0.5(8)    |
| C(10A)-C(9A)-C(8A)-N(7A)    | -177.2(5)  |
| C(13A)-C(8A)-N(7A)-C(5A)    | 148.0(5)   |
| C(9A)-C(8A)-N(7A)-C(5A)     | -35.4(9)   |
| C(8A)-N(7A)-C(5A)-C(6A)     | -14.7(9)   |
| C(8A)-N(7A)-C(5A)-C(4A)     | 164.7(5)   |
| N(7A)-C(5A)-C(4A)-C(3A)     | -178.0(5)  |
| C(6A)-C(5A)-C(4A)-C(3A)     | 1.5(8)     |
| N(7A)-C(5A)-C(4A)-N(4A)     | -0.4(8)    |
| C(6A)-C(5A)-C(4A)-N(4A)     | 179.0(5)   |
| C(3A)-C(4A)-N(4A)-O(4A)     | 16.5(8)    |
| C(5A)-C(4A)-N(4A)-O(4A)     | -161.2(5)  |
| C(3A)-C(4A)-N(4A)-O(4'A)    | -165.0(5)  |
| C(5A)-C(4A)-N(4A)-O(4'A)    | 17.3(8)    |
| C(5A)-C(4A)-C(3A)-C(2A)     | 0.3(8)     |
| N(4A)-C(4A)-C(3A)-C(2A)     | -177.4(5)  |
| C(4A)-C(3A)-C(2A)-C(1A)     | -0.2(8)    |
| C(4A)-C(3A)-C(2A)-N(2'A)    | 175.6(5)   |
| C(3A)-C(2A)-N(2'A)-O(2'A)   | -169.0(7)  |
| C(1A)-C(2A)-N(2'A)-O(2'A)   | 6.6(10)    |

---

**Table S12.** (continued)

---

|                             |           |
|-----------------------------|-----------|
| C(3A)-C(2A)-N(2'A)-O(2"A)   | 6.4(9)    |
| C(1A)-C(2A)-N(2'A)-O(2"A)   | -178.0(6) |
| C(3A)-C(2A)-C(1A)-O(2A)     | 178.9(5)  |
| N(2'A)-C(2A)-C(1A)-O(2A)    | 3.5(8)    |
| C(3A)-C(2A)-C(1A)-C(6A)     | -1.9(8)   |
| N(2'A)-C(2A)-C(1A)-C(6A)    | -177.3(5) |
| O(2A)-C(1A)-C(6A)-C(5A)     | -176.9(5) |
| C(2A)-C(1A)-C(6A)-C(5A)     | 3.9(8)    |
| N(7A)-C(5A)-C(6A)-C(1A)     | 175.8(5)  |
| C(4A)-C(5A)-C(6A)-C(1A)     | -3.6(8)   |
| C(6A)-C(1A)-O(2A)-N(2A)     | 2.6(7)    |
| C(2A)-C(1A)-O(2A)-N(2A)     | -178.3(4) |
| C(1A)-O(2A)-N(2A)-N(1A)     | 174.4(5)  |
| O(2A)-N(2A)-N(1A)-O(1A)     | -2.1(8)   |
| O(2A)-N(2A)-N(1A)-N(3A)     | 172.8(5)  |
| O(1A)-N(1A)-N(3A)-C(3"A)    | -31.8(11) |
| N(2A)-N(1A)-N(3A)-C(3"A)    | 153.0(8)  |
| O(1A)-N(1A)-N(3A)-C(3'A)    | -174.6(7) |
| N(2A)-N(1A)-N(3A)-C(3'A)    | 10.1(10)  |
| C(8B)-C(9B)-C(10B)-C(11B)   | -0.2(9)   |
| C(8B)-C(9B)-C(10B)-C(14B)   | -179.8(5) |
| C(11B)-C(10B)-C(14B)-O(14B) | 173.9(6)  |
| C(9B)-C(10B)-C(14B)-O(14B)  | -6.4(9)   |
| C(11B)-C(10B)-C(14B)-O(15B) | -8.4(9)   |
| C(9B)-C(10B)-C(14B)-O(15B)  | 171.3(5)  |
| C(9B)-C(10B)-C(11B)-C(12B)  | 1.5(9)    |
| C(14B)-C(10B)-C(11B)-C(12B) | -178.8(6) |
| C(10B)-C(11B)-C(12B)-C(13B) | -1.9(10)  |
| C(11B)-C(12B)-C(13B)-C(8B)  | 1.0(10)   |
| C(12B)-C(13B)-C(8B)-C(9B)   | 0.4(10)   |
| C(12B)-C(13B)-C(8B)-N(7B)   | -175.3(6) |
| C(10B)-C(9B)-C(8B)-C(13B)   | -0.8(9)   |
| C(10B)-C(9B)-C(8B)-N(7B)    | 174.6(5)  |
| C(13B)-C(8B)-N(7B)-C(5B)    | -139.7(6) |
| C(9B)-C(8B)-N(7B)-C(5B)     | 44.8(9)   |
| C(8B)-N(7B)-C(5B)-C(6B)     | 1.5(10)   |
| C(8B)-N(7B)-C(5B)-C(4B)     | -179.1(6) |
| N(7B)-C(5B)-C(4B)-C(3B)     | 178.1(6)  |
| C(6B)-C(5B)-C(4B)-C(3B)     | -2.4(9)   |
| N(7B)-C(5B)-C(4B)-N(4B)     | -1.8(9)   |
| C(6B)-C(5B)-C(4B)-N(4B)     | 177.6(5)  |
| C(3B)-C(4B)-N(4B)-O(4B)     | 2.5(9)    |
| C(5B)-C(4B)-N(4B)-O(4B)     | -177.5(6) |
| C(3B)-C(4B)-N(4B)-O(4'B)    | -176.7(6) |
| C(5B)-C(4B)-N(4B)-O(4'B)    | 3.3(9)    |
| C(5B)-C(4B)-C(3B)-C(2B)     | 0.1(9)    |

---

**Table S12.** (continued)

---

|                             |            |
|-----------------------------|------------|
| N(4B)-C(4B)-C(3B)-C(2B)     | -180.0(5)  |
| C(4B)-C(3B)-C(2B)-C(1B)     | 1.5(9)     |
| C(4B)-C(3B)-C(2B)-N(2'B)    | -176.8(5)  |
| C(3B)-C(2B)-N(2'B)-O(2''B)  | -10.8(9)   |
| C(1B)-C(2B)-N(2'B)-O(2''B)  | 171.0(6)   |
| C(3B)-C(2B)-N(2'B)-O(2'B)   | 167.2(6)   |
| C(1B)-C(2B)-N(2'B)-O(2'B)   | -11.0(9)   |
| C(3B)-C(2B)-C(1B)-C(6B)     | -0.7(9)    |
| N(2'B)-C(2B)-C(1B)-C(6B)    | 177.5(5)   |
| C(3B)-C(2B)-C(1B)-O(2B)     | 176.0(5)   |
| N(2'B)-C(2B)-C(1B)-O(2B)    | -5.8(8)    |
| O(2B)-C(1B)-C(6B)-C(5B)     | -178.3(5)  |
| C(2B)-C(1B)-C(6B)-C(5B)     | -1.8(9)    |
| N(7B)-C(5B)-C(6B)-C(1B)     | -177.3(5)  |
| C(4B)-C(5B)-C(6B)-C(1B)     | 3.3(8)     |
| C(6B)-C(1B)-O(2B)-N(2B)     | -8.3(7)    |
| C(2B)-C(1B)-O(2B)-N(2B)     | 175.1(5)   |
| C(1B)-O(2B)-N(2B)-N(1B)     | 174.0(5)   |
| O(2B)-N(2B)-N(1B)-O(1B)     | -1.3(9)    |
| O(2B)-N(2B)-N(1B)-N(3'B)    | 152(4)     |
| O(2B)-N(2B)-N(1B)-N(3B)     | -169.9(11) |
| O(1B)-N(1B)-N(3B)-C(3''B)   | 32(2)      |
| N(3'B)-N(1B)-N(3B)-C(3''B)  | -64(3)     |
| N(2B)-N(1B)-N(3B)-C(3''B)   | -158.2(13) |
| O(1B)-N(1B)-N(3B)-C(3'B)    | 162(2)     |
| N(3'B)-N(1B)-N(3B)-C(3'B)   | 66(4)      |
| N(2B)-N(1B)-N(3B)-C(3'B)    | -29(3)     |
| O(1B)-N(1B)-N(3'B)-C(3''E)  | -33(7)     |
| N(2B)-N(1B)-N(3'B)-C(3''E)  | 172(4)     |
| N(3B)-N(1B)-N(3'B)-C(3''E)  | 71(6)      |
| O(1B)-N(1B)-N(3'B)-C(3'E)   | -155(3)    |
| N(2B)-N(1B)-N(3'B)-C(3'E)   | 49(6)      |
| N(3B)-N(1B)-N(3'B)-C(3'E)   | -52(4)     |
| C(8C)-C(9C)-C(10C)-C(11C)   | -0.3(9)    |
| C(8C)-C(9C)-C(10C)-C(14C)   | 179.9(5)   |
| C(11C)-C(10C)-C(14C)-O(15C) | -10.6(9)   |
| C(9C)-C(10C)-C(14C)-O(15C)  | 169.3(6)   |
| C(11C)-C(10C)-C(14C)-O(14C) | 170.5(6)   |
| C(9C)-C(10C)-C(14C)-O(14C)  | -9.7(9)    |
| C(9C)-C(10C)-C(11C)-C(12C)  | 1.2(9)     |
| C(14C)-C(10C)-C(11C)-C(12C) | -179.0(6)  |
| C(10C)-C(11C)-C(12C)-C(13C) | -0.7(9)    |
| C(11C)-C(12C)-C(13C)-C(8C)  | -0.6(9)    |
| C(10C)-C(9C)-C(8C)-C(13C)   | -1.1(8)    |
| C(10C)-C(9C)-C(8C)-N(7C)    | 173.0(5)   |
| C(12C)-C(13C)-C(8C)-C(9C)   | 1.6(9)     |

---

**Table S12.** (continued)

---

|                            |           |
|----------------------------|-----------|
| C(12C)-C(13C)-C(8C)-N(7C)  | -173.0(5) |
| C(9C)-C(8C)-N(7C)-C(5C)    | 36.2(9)   |
| C(13C)-C(8C)-N(7C)-C(5C)   | -149.5(6) |
| C(8C)-N(7C)-C(5C)-C(6C)    | 7.4(9)    |
| C(8C)-N(7C)-C(5C)-C(4C)    | -176.9(5) |
| N(7C)-C(5C)-C(4C)-C(3C)    | -179.7(5) |
| C(6C)-C(5C)-C(4C)-C(3C)    | -3.8(8)   |
| N(7C)-C(5C)-C(4C)-N(4C)    | -0.5(9)   |
| C(6C)-C(5C)-C(4C)-N(4C)    | 175.4(5)  |
| C(3C)-C(4C)-N(4C)-O(4C)    | 5.0(9)    |
| C(5C)-C(4C)-N(4C)-O(4C)    | -174.2(6) |
| C(3C)-C(4C)-N(4C)-O(4'C)   | -175.5(6) |
| C(5C)-C(4C)-N(4C)-O(4'C)   | 5.2(10)   |
| C(5C)-C(4C)-C(3C)-C(2C)    | -0.3(9)   |
| N(4C)-C(4C)-C(3C)-C(2C)    | -179.6(6) |
| C(4C)-C(3C)-C(2C)-C(1C)    | 4.9(9)    |
| C(4C)-C(3C)-C(2C)-N(2'C)   | -177.0(5) |
| C(3C)-C(2C)-N(2'C)-O(2'C)  | 172.2(6)  |
| C(1C)-C(2C)-N(2'C)-O(2'C)  | -9.7(9)   |
| C(3C)-C(2C)-N(2'C)-O(2''C) | -3.2(8)   |
| C(1C)-C(2C)-N(2'C)-O(2''C) | 174.9(5)  |
| C(3C)-C(2C)-C(1C)-O(2C)    | 175.4(5)  |
| N(2'C)-C(2C)-C(1C)-O(2C)   | -2.7(8)   |
| C(3C)-C(2C)-C(1C)-C(6C)    | -5.2(8)   |
| N(2'C)-C(2C)-C(1C)-C(6C)   | 176.8(5)  |
| O(2C)-C(1C)-C(6C)-C(5C)    | -179.6(5) |
| C(2C)-C(1C)-C(6C)-C(5C)    | 1.0(8)    |
| N(7C)-C(5C)-C(6C)-C(1C)    | 179.3(5)  |
| C(4C)-C(5C)-C(6C)-C(1C)    | 3.4(8)    |
| C(6C)-C(1C)-O(2C)-N(2C)    | -6.1(7)   |
| C(2C)-C(1C)-O(2C)-N(2C)    | 173.3(5)  |
| C(1C)-O(2C)-N(2C)-N(1C)    | 174.0(5)  |
| O(2C)-N(2C)-N(1C)-O(1C)    | -4.8(10)  |
| O(2C)-N(2C)-N(1C)-N(3C)    | 160(3)    |
| O(2C)-N(2C)-N(1C)-N(3'C)   | -167(2)   |
| O(1C)-N(1C)-N(3C)-C(3''C)  | -19(5)    |
| N(2C)-N(1C)-N(3C)-C(3''C)  | 175(3)    |
| N(3'C)-N(1C)-N(3C)-C(3''C) | 73(4)     |
| O(1C)-N(1C)-N(3C)-C(3'C)   | -173(3)   |
| N(2C)-N(1C)-N(3C)-C(3'C)   | 21(5)     |
| N(3'C)-N(1C)-N(3C)-C(3'C)  | -81(6)    |
| O(1C)-N(1C)-N(3'C)-C(3''F) | 32(4)     |
| N(2C)-N(1C)-N(3'C)-C(3''F) | -163(3)   |
| N(3C)-N(1C)-N(3'C)-C(3''F) | -71(3)    |
| O(1C)-N(1C)-N(3'C)-C(3'F)  | 170(2)    |
| N(2C)-N(1C)-N(3'C)-C(3'F)  | -25(3)    |

---

**Table S12.** (continued)

|                           |       |
|---------------------------|-------|
| N(3C)-N(1C)-N(3'C)-C(3'F) | 67(5) |
|---------------------------|-------|



**Table S13.** IC<sub>50</sub> Values (μM) for Compounds **6a** – **6d** in the HL-60 and NIH 3T3 Cell Lines

| Compound  | HL-60 | NIH3T3 |
|-----------|-------|--------|
| <b>6a</b> | 6.3   | 5.6    |
| <b>6b</b> | 9.1   | 73     |
| <b>6c</b> | 10.1  | 80     |
| <b>6d</b> | 11.6  | 83     |

## Descriptions of Methods Used to Collect Data for Table S13

**Cell Culture for the HL-60 Screen.** Human myeloid leukemia HL-60 cells (ATCC, Manassas, VA) were cultured in RPMI-1640 medium supplemented with 10% fetal bovine serum and penicillin/streptomycin. Cells were cultured at 37 °C in a 5% CO<sub>2</sub>-humidified atmosphere. Cultures were initiated in 96-well plates in a total volume of 100 µL. Five millimolar stock solutions of each compound were made in dimethyl sulfoxide (DMSO) and serially diluted in phosphate buffered saline (PBS) before addition to the cultures. Dose-response cultures were established with concentrations ranging from 0 to 100 µM. The final concentration of DMSO added to the cultures was 0.1% or less. For each experiment, compounds were added to cells in logarithmic phase growth. Three days after addition of the compounds, cell viability was measured as described below. For each compound screened, at least three replicates were collected.

**Cell Viability Assay for the HL-60 Screen.** Cell viability was determined using the CellTiter 96 assay from Promega (Madison, WI) using 3-(4,5-dimethylthiazol-2-yl)-5-(3-carboxymethoxyphenyl)-2-(4-sulfophenyl)-2H-tetrazolium, inner salt (MTS), mixed with an electron coupling reagent, phenazine ethosulfate (PES). Seventy two hours after adding compounds to the cultures, 20 µL of the MTS reagent was added to each well and the plate was further incubated for 3-4 hours at 37 °C, whereupon spectrophotometric absorbance of samples was measured at 495 nm. The IC<sub>50</sub> of each compound was determined from growth curves generated by expressing the absorbance of each variable as a percentage of untreated controls.

**Cytotoxicity Assays in NIH3T3 Cells.** Ten thousand NIH3T3 cells were seeded in 96-well plates in 50 µL of medium. Increasing drug concentrations were added to a

final volume of 100  $\mu$ L and the cells were maintained in drug for 72 h. Following drug exposure, cell viability was assayed by the 3-(4,5-dimethylthiazol-2-yl)-2,5-diphenyltetrazolium bromide (MTT) conversion assay. Each drug concentration was represented in quadruplicate and the experiments were repeated in three independent replicates. Mean values and S.E. were computed for each group.

**Table S14.** Dependence of First-Order Rate Constants for Reaction of **6a** - **6d** with Glutathione in 0.10 M Phosphate Buffer on Glutathione Concentration.

| <b>6a</b>     |                                                  | <b>6b</b>     |                                                  | <b>6c</b>     |                                                  | <b>6d</b>     |                                                  |
|---------------|--------------------------------------------------|---------------|--------------------------------------------------|---------------|--------------------------------------------------|---------------|--------------------------------------------------|
| [GSH]<br>(mM) | $k_{\text{obs}}$ (s <sup>-1</sup> ) <sup>a</sup> | [GSH]<br>(mM) | $k_{\text{obs}}$ (s <sup>-1</sup> ) <sup>b</sup> | [GSH]<br>(mM) | $k_{\text{obs}}$ (s <sup>-1</sup> ) <sup>b</sup> | [GSH]<br>(mM) | $k_{\text{obs}}$ (s <sup>-1</sup> ) <sup>b</sup> |
| 2.50          | 1.36 x 10 <sup>-3</sup>                          | 0.50          | 4.16 x 10 <sup>-5</sup>                          | 2.00          | 6.58 x 10 <sup>-5</sup>                          | 0.50          | 1.76 x 10 <sup>-4</sup>                          |
| 5.00          | 1.72 x 10 <sup>-3</sup>                          | 2.00          | 7.51 x 10 <sup>-5</sup>                          | 5.00          | 1.74 x 10 <sup>-4</sup>                          | 1.00          | 2.11 x 10 <sup>-4</sup>                          |
| 10.0          | 3.75 x 10 <sup>-3</sup>                          | 5.00          | 2.51 x 10 <sup>-4</sup>                          | 10.0          | 4.66 x 10 <sup>-4</sup>                          | 2.00          | 3.58 x 10 <sup>-4</sup>                          |
| 20.0          | 6.50 x 10 <sup>-3</sup>                          | 7.50          | 3.42 x 10 <sup>-4</sup>                          | 15.0          | 7.76 x 10 <sup>-4</sup>                          | 3.00          | 4.74 x 10 <sup>-4</sup>                          |
|               |                                                  | 10.0          | 4.27 x 10 <sup>-4</sup>                          | 20.0          | 9.38 x 10 <sup>-4</sup>                          | 5.00          | 7.47 x 10 <sup>-4</sup>                          |

<sup>a</sup> Measured by following loss of substrate by HPLC at room temperature. <sup>b</sup> Measured by UV spectrophotometry at the  $\lambda_{\text{max}}$  of the glutathione conjugate (**6b** at 341 nm, **6c** at 335 nm, **6d** at 346 nm) at 37 °C. Data fitting and statistical analysis ( $k_{\text{obs}} = k_{\text{GSH}}[\text{GSH}] + k_{\text{hydrolysis}}$ ) using Microsoft EXCEL.

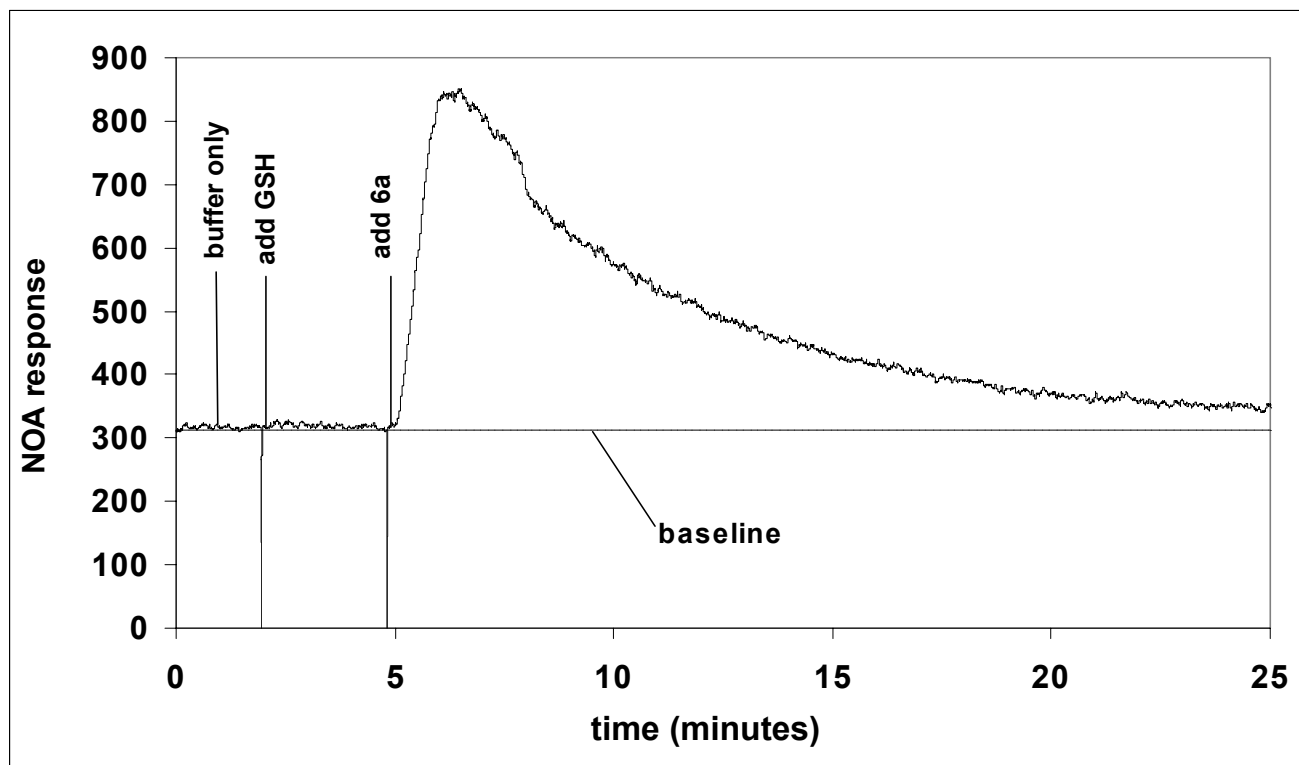

Figure S2. Nitric oxide generation during reaction of the GSH with **6a**. Buffer (1.8 mL of 0.1 M sodium phosphate, pH 7.4) at 37 °C was purged with argon beginning at time 0 to remove oxygen, with effluent gases being passed into a chemiluminescence detector (NOA = Nitric Oxide Analyzer) for quantitation of NO production in the solution. GSH (final concentration 200  $\mu$ M) and **6a** at a final concentration of 0.5  $\mu$ M were injected into the reaction chamber at the indicated times. NO was detected only when GSH and **6a** were present in the reaction mixture at the same time.

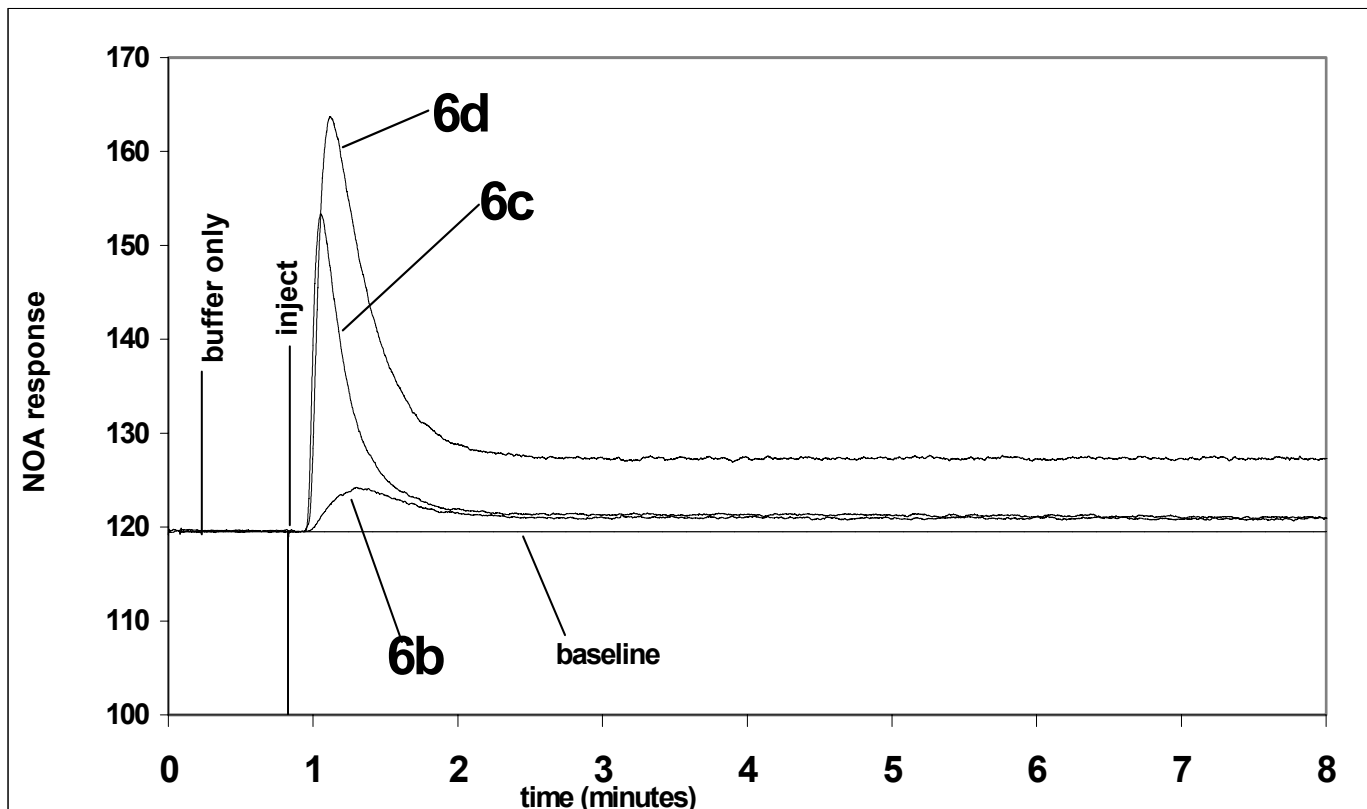

Figure S3. Nitric oxide generation during reaction of the GSH with **6b** – **6d**. Buffer (1.8 mL of 0.1 M sodium phosphate, pH 7.4) at 37 °C was purged with argon beginning at time 0 to remove oxygen, with effluent gases being passed into a chemiluminescence detector (NOA = Nitric Oxide Analyzer) for quantitation of NO production in the solution. Solutions of GSH with **6b**, **6c**, and **6d** were prepared individually in buffer and injected (within 20 s of dissolution) into the purging buffer as indicated by the arrow, such that the final concentrations were 100  $\mu$ M in GSH and 10  $\mu$ M in **6b**, **6c**, or **6d**. NO was detected only when GSH and the PABA/NO analogues were present in the reaction mixture at the same time.
